# Supplementary material for: Gestational diabetes is driven by microbiota-induced inflammation months before diagnosis
Source: HighWire-hosted journal article supplement (doi:10.1136/gutjnl-2022-328406), 2023-01-10
Supplement: gutjnl-2022-328406supp002_data_supplement.xlsx [file gutjnl-2022-328406supp002_data_supplement.xlsx]

## Sheet: S1
Mice cytokines
diagnosis	IL-6	IL-10	IL-17A	IFN-g	TNF-a
Control	1.71571	19.5229	6.42	4.89	14.0843
GDM	2.97429	23.5943	3.00429	3.71429	13.7657
Pval	0.00873444	0.0146393	0.804779	0.948778	0.300223

## Sheet: S2 
Mice hormones
diagnosis	Leptin	Insulin
Control	6511.55	1867.67
GDM	4693.6	1542.95
Pval	0.382867	0.564871

## Sheet: S3
Additional cohorts
Cohort	Experiment	mice group	mice age	Healthy	Pre-GDM
Finnish	PGD1	1	6 weeks	6	6
Finnish	PGD2_6w	2	6 weeks	5	6
Finnish	PGD2_11w	3	11 weeks	5	6
STORK	PGD3_8w	4	8 weeks	6	6
STORK	PGD3_12w	4	12 weeks	5	6

## Sheet: S4
ipgtt experiments- raw and combined p-values
	PGD1	PGD2_6w	PGD2_11w	PGD3_8w	PGD3_12w	combined
0	0.0641026	0.232096	0.0603454	0.885117	0.882333	0.150341
30	0.0226638	0.0414187	0.117667	0.65554	0.392096	0.0215236
60	0.810761	0.0178819	0.261408	0.764415	0.117667	0.100554
120	0.851023	0.157651	0.0603454	0.531907	0.392096	0.236947

## Sheet: S5
ipGTT experiments
cohort	State	Donor	Mouse_age	GTT_0	GTT_30	GTT_60	GTT_120	Experiment
PGD1	H	106	6_weeks	106.5	289	256	190	PGD1
PGD1	H	139	6_weeks	96	179.5	174	140	PGD1
PGD1	H	145	6_weeks	90.5	221.5	200	134	PGD1
PGD1	H	147	6_weeks	73	199	193	134.5	PGD1
PGD1	H	348	6_weeks	89.5	171	175	139.5	PGD1
PGD1	H	356	6_weeks	125.5	173.5	147	128.5	PGD1
PGD1	GD	127	6_weeks	138	225	188.5	147	PGD1
PGD1	GD	261	6_weeks	102	230	210	133	PGD1
PGD1	GD	329	6_weeks	121.5	234.5	171	123.5	PGD1
PGD1	GD	331	6_weeks	104.5	294	105	129.5	PGD1
PGD1	GD	344	6_weeks	106	238.5	168.5	119.5	PGD1
PGD1	GD	354	6_weeks	120	256.5	189.5	172.5	PGD1
PGD2	H	106	6_weeks	100.5	202	168	136.5	PGD2_6w
PGD2	H	139	6_weeks	109	176	152.5	132	PGD2_6w
PGD2	H	145	6_weeks	107	155	176.5	147.5	PGD2_6w
PGD2	H	147	6_weeks	92.5	184	163.5	168	PGD2_6w
PGD2	H	348	6_weeks	123	264	195.5	167	PGD2_6w
PGD2	GD	127	6_weeks	120	185.5	182	125.5	PGD2_6w
PGD2	GD	261	6_weeks	133	244	212	188.5	PGD2_6w
PGD2	GD	329	6_weeks	128.5	216	216	155.5	PGD2_6w
PGD2	GD	331	6_weeks	107	216.5	192	186	PGD2_6w
PGD2	GD	344	6_weeks	106	276.5	254.5	203.5	PGD2_6w
PGD2	GD	354	6_weeks	97	314	180.5	148	PGD2_6w
PGD2	H	106	11_weeks	98.5	261	205.5	173	PGD2_11w
PGD2	H	139	11_weeks	104	225	165.5	149.5	PGD2_11w
PGD2	H	145	11_weeks	127.5	155.5	160	125	PGD2_11w
PGD2	H	147	11_weeks	112.5	169	229	168	PGD2_11w
PGD2	H	348	11_weeks	83.5	291.5	220.5	157	PGD2_11w
PGD2	GD	127	11_weeks	117.5	174	201	166.5	PGD2_11w
PGD2	GD	261	11_weeks	135.5	263	223	180	PGD2_11w
PGD2	GD	329	11_weeks	141	302	218.5	160	PGD2_11w
PGD2	GD	331	11_weeks	95.5	259	254	171	PGD2_11w
PGD2	GD	344	11_weeks	123	332	220	189.5	PGD2_11w
PGD2	GD	354	11_weeks	135	233.5	187	169.5	PGD2_11w
PGD3	GD	1084	8_weeks	112	208.5	188.5	157.5	PGD3_8w
PGD3	GD	2050	8_weeks	110.5	328.5	257	210.5	PGD3_8w
PGD3	GD	2240	8_weeks	112.5	346	254	220	PGD3_8w
PGD3	GD	2361	8_weeks	107.5	305	210.5	149.5	PGD3_8w
PGD3	GD	2437	8_weeks	116	170	173	142	PGD3_8w
PGD3	GD	2559	8_weeks	121.5	265.5	211	184.5	PGD3_8w
PGD3	H	1015	8_weeks	111.5	324	212	160.5	PGD3_8w
PGD3	H	1060	8_weeks	109	301	192	146	PGD3_8w
PGD3	H	2146	8_weeks	146	365.5	244.5	198.5	PGD3_8w
PGD3	H	2284	8_weeks	113	243.5	189	169	PGD3_8w
PGD3	H	2371	8_weeks	127	245	239.5	172.5	PGD3_8w
PGD3	H	2439	8_weeks	123.5	285	313	194.5	PGD3_8w
PGD3	GD	2437	12_weeks	123.5	362	251	209.5	PGD3_12w
PGD3	GD	2361	12_weeks	112.5	266	275.5	182.5	PGD3_12w
PGD3	GD	1084	12_weeks	118	237.5	226.5	175	PGD3_12w
PGD3	GD	2240	12_weeks	139.5	367.5	263.5	207.5	PGD3_12w
PGD3	GD	2559	12_weeks	96	287.5	211	184.5	PGD3_12w
PGD3	GD	2050	12_weeks	147.5	380	259.5	206	PGD3_12w
PGD3	H	2439	12_weeks	140.5	377	247.5	186.5	PGD3_12w
PGD3	H	1060	12_weeks	124	208.5	205.5	166.5	PGD3_12w
PGD3	H	1015	12_weeks	136	238	193	182	PGD3_12w
PGD3	H	2284	12_weeks	131	413	347	223.5	PGD3_12w
PGD3	H	2371	12_weeks	130	258	207	191.5	PGD3_12w

## Sheet: S6
Fecal metabolites
Name	Formula	Molecular Weight	RT [min]	mzCloud Best Match	Ratio: (1, GDM) / (1, CONTROL)	P-value: (1, GDM) / (1, CONTROL)
α-Aspartylphenylalanine	C13 H16 N2 O5	280.106	4.074	71.4	0.646	0.0242932
Xanthine	C5 H4 N4 O2	152.033	3.903		0.383	0.0199546
Xanthine	C5 H4 N4 O2	152.034	4.265		0.509	0.0311723
Warfarin	C19 H16 O4	308.105	15.469		2.555	0.0391351
VLK	C17 H34 N4 O4	358.258	4.348	68	0.463	0.0140486
Veronal	C8 H12 N2 O3	184.085	3.178		0.491	0.0465407
Venlafaxine	C17 H27 N O2	277.204	7.298	68.2	0.106	0.035668
Val-Trp	C16 H21 N3 O3	303.159	5.747		0.593	0.0224048
val-phe	C14 H20 N2 O3	264.148	5.508		0.625	0.00597979
val-phe	C14 H20 N2 O3	264.148	5.2		0.452	0.00746291
Val-Met	C10 H20 N2 O3 S	248.12	4.509		0.358	0.00111605
Val-Met	C10 H20 N2 O3 S	248.12	4.319		0.393	0.0011399
Ureidosuccinic acid	C5 H8 N2 O5	176.044	1.706		4.246	0.0105102
tyr-thr	C13 H18 N2 O5	282.122	2.235		0.572	0.0242946
tyr-ser	C12 H16 N2 O5	268.106	3.864		0.502	0.0229249
tyr-ser	C12 H16 N2 O5	268.106	3.603		0.573	0.0333841
Tyr-Phe	C18 H20 N2 O4	328.143	5.807		0.468	0.0457141
Tyrosylleucine	C15 H22 N2 O4	294.158	5.409		0.678	0.0127086
Tyrosylleucine	C15 H22 N2 O4	294.158	5.358		0.744	0.0141509
Tyrosylalanine	C12 H16 N2 O4	252.111	4.488	69.3	0.432	0.0191096
tyr-gln	C14 H19 N3 O5	309.133	3.94		0.769	0.0238063
tyramine sulfate	C8 H11 N O4 S	217.041	3.284		3.234	0.0114188
Tyramine	C8 H11 N O	137.084	2.738		2.013	0.0224596
Tropine	C8 H15 N O	141.115	7.663	67.4	0.682	0.049666
tretoquinol	C19 H23 N O5	345.158	8.859		0.418	0.0269503
Tretinoin Glucuronide	C26 H36 O8	476.241	8.845		0.657	0.0392762
Toxopyrimidine	C6 H9 N3 O	139.075	3.26		1.861	0.016851
Tolycaine	C15 H22 N2 O3	278.163	6.137	78.8	0.472	0.00172046
Tolycaine	C15 H22 N2 O3	278.163	6.771	94	0.779	0.0347986
tilisolol	C17 H24 N2 O3	304.179	9.332		0.188	0.0178984
tilisolol	C17 H24 N2 O3	304.179	15.067		0.175	0.0316302
tilisolol	C17 H24 N2 O3	304.179	6.956		0.529	0.0338426
tilisolol	C17 H24 N2 O3	304.179	12.556		0.316	0.0373262
tilisolol	C17 H24 N2 O3	304.179	7.237		0.331	0.0396537
thr-tyr	C13 H18 N2 O5	282.122	3.958		0.468	0.0327183
threonylphenylalanine	C13 H18 N2 O4	266.127	4.141		0.585	0.00362798
threonylphenylalanine	C13 H18 N2 O4	266.127	3.975		0.406	0.00783033
Tetralin	C10 H12	132.094	5.961		2.343	0.0304351
Terpestacin	C25 H38 O4	402.277	22.523	68.3	0.677	0.0464718
terizidone	C14 H14 N4 O4	302.1	26.552		0.808	0.0213941
Tenuazonic acid	C10 H15 N O3	197.105	4.198		0.694	0.0393537
TDP-2	C17 H22 N2 O5	334.153	7.565		1.926	0.00830203
Talbutal	C11 H16 N2 O3	224.116	4.857		0.533	0.0156577
Talatizamine	C24 H39 N O5	421.283	7.728		0.384	0.0392206
Succinanilic acid	C10 H11 N O3	193.074	5.157		4.468	0.0317263
stearoylcarnitine	C25 H49 N O4	427.366	23.208		3.552	0.0400832
Stearoyl ethanolamide	C20 H41 N O2	327.314	27.485	96.3	3.63	0.00797444
Stearidonic acid	C18 H28 O2	276.209	25.625		0.301	0.0446835
Sphingosine (d18:1)	C18 H37 N O2	299.283	17.686	91.7	9.753	0.00294367
Sphingosine (d18:1)	C18 H37 N O2	299.283	16.458	72.1	2.751	0.0236502
sphinganine	C18 H39 N O2	301.298	18.785		11.344	0.001143
soyasapogenol A	C30 H50 O4	474.371	24.155		0.446	0.00823957
Ser-Leu	C9 H18 N2 O4	218.127	4.626		0.397	0.000708078
Sarsasapogenin	C27 H44 O3	416.329	24.624		0.43	0.0246037
S-(-)-Cathinone	C9 H11 N O	149.084	1.769		0.733	0.0433562
Roxatidine	C17 H26 N2 O3	306.194	8.683		0.179	0.0394301
Ricinoleic Acid	C18 H34 O3	298.251	7.683		3.213	0.0105881
Rhynchophylline	C22 H28 N2 O4	384.205	8.535		0.2	0.0172062
Rhynchophylline	C22 H28 N2 O4	384.205	7.27		0.425	0.0245408
RH0365500	C8 H17 N O2	159.126	3.859		0.53	0.0315849
QV1MVO1R	C10 H11 N O4	209.068	4.94		0.614	0.0188303
Pyrithyldione	C9 H13 N O2	167.095	1.324		0.587	0.040623
Pyridoxamine	C8 H12 N2 O2	168.09	1.235	67.9	0.534	0.00121086
Pulcherriminic acid	C12 H20 N2 O4	256.142	4.393		0.601	0.0311528
Pro-tyr	C14 H18 N2 O4	278.127	6.004		1.549	0.0275506
Pro-Pro	C10 H16 N2 O3	212.116	3.788		0.479	0.00732452
Propoxur	C11 H15 N O3	209.105	3.566		0.334	0.0115405
Pro-Hyp	C10 H16 N2 O4	228.111	3.615		0.577	0.0406444
porphobilinogen	C10 H14 N2 O4	226.095	3.678		0.672	0.0352256
Pivagabine	C9 H17 N O3	187.121	2.08		0.276	7.28111e-05
Pivagabine	C9 H17 N O3	187.121	1.334		0.263	0.0459309
Phenylglycine	C8 H9 N O2	151.064	1.214		0.59	0.00948012
phensuximide	C11 H11 N O2	189.079	7.431		1.412	0.0173814
Phenol, 2-(3,7-dimethylocta-2,6-dienyl)-	C16 H22 O	230.167	24.213		0.602	0.00986868
Phenelzine	C8 H12 N2	136.1	5.381		0.35	0.0338215
phe-asn	C13 H17 N3 O4	279.122	3.542		0.637	0.0338509
P-Gal	C12 H16 O6	256.095	24.146		0.883	0.0183402
Perindoprilat	C17 H28 N2 O5	340.2	5.662		0.679	0.0396965
pentane-1,2,3,4,5-pentol	C5 H12 O5	152.068	1.209		0.62	0.02054
Pendimethalin	C13 H19 N3 O4	281.138	1.328		0.791	0.039054
p-cymene	C10 H14	134.11	24.203		0.6	0.0153633
Pardoprunox	C12 H15 N3 O2	233.117	4.995		0.529	0.00679562
Parbendazole	C13 H17 N3 O2	247.132	5.654		0.676	0.0453391
Panthenol	C9 H19 N O4	205.132	1.337		0.634	0.0437407
Palmitoyl ethanolamide	C18 H37 N O2	299.283	25.49	98.2	2.105	0.0382381
Palmitoyl ethanolamide	C18 H37 N O2	299.283	19.103	79.2	0.669	0.0427448
Oxymetazoline	C16 H24 N2 O	260.189	6.961	68.2	0.28	0.0124633
Oxymetazoline	C16 H24 N2 O	260.189	15.044	65	0.181	0.0168122
Oxymetazoline	C16 H24 N2 O	260.189	9.321	75.7	0.153	0.0249597
Oxymetazoline	C16 H24 N2 O	260.189	8.684		0.171	0.0334891
Oxymetazoline	C16 H24 N2 O	260.189	6.706	74.6	0.386	0.0417953
octadec-9-ynoic acid	C18 H32 O2	280.24	16.138	79.8	0.468	0.0101432
Obeticholic acid	C26 H44 O4	420.325	23.99		0.328	0.0202742
O-Acetylcypholophine	C20 H28 N2 O4	360.205	8.314		0.61	0.0102134
nylon cyclic dimer	C12 H22 N2 O2	226.168	6.135		1.702	0.0201409
N-Tridecanoylglycine	C15 H29 N O3	271.215	11.756		0.612	0.0126865
NS1800000	C8 H9 N O4	183.053	2.121		0.485	0.00342151
N-palmitoylserinol	C19 H39 N O3	329.293	24.249		0.285	0.00874623
N-palmitoylserinol	C19 H39 N O3	329.293	23.624		0.115	0.0122751
NP-019855	C15 H18 O5	278.115	8.343	72.4	3.561	0.0045651
NP-019855	C15 H18 O5	278.115	8.155	74.2	6.285	0.0115368
NP-017061	C20 H30 O4	334.215	10.993	85.2	0.159	0.0396267
NP-013210	C12 H14 O3	206.094	13.258	70.3	1.263	0.023796
NP-012972	C14 H24 O3	240.173	7.033	69.8	0.567	0.0135426
NP-003692	C29 H46 O4	458.34	26.584	74.1	0.905	0.0495861
NP-003553	C20 H34 O4	338.246	14.656	88	2.001	0.0360468
N-lauroylglycine	C14 H27 N O3	257.199	5.876		0.482	0.032377
NJ5000000	C8 H15 N3 O2	185.117	3.257		0.588	0.00375165
Nitroxoline	C9 H6 N2 O3	190.037	2.308		0.599	0.0317364
Ninhydrin	C9 H6 O4	178.027	3.604		5.838	0.022062
N-Desmethylvenlafaxine	C16 H25 N O2	263.189	6.854	60.6	0.179	0.0304967
n-Amylbenzene	C11 H16	148.125	24.199		0.623	0.0118821
N-Acetylvaline	C7 H13 N O3	159.09	1.814		0.683	0.0471664
N-Acetyl-L-phenylalanine	C11 H13 N O3	207.089	6.646		0.523	0.045653
N~6~-(5-Oxo-D-isoleucyl)-L-lysine	C12 H23 N3 O4	273.169	4.259		0.623	0.0087748
N~6~-(5-Oxo-D-isoleucyl)-L-lysine	C12 H23 N3 O4	273.169	4.414		0.684	0.0184854
N,N'-Di(2,3-butadien-1-yl)-1,4-butanediamine	C12 H20 N2	192.163	5.491		0.433	0.0198918
N-(Carboxymethyl)norleucine	C8 H15 N O4	189.1	4.384		0.4	0.0428952
N-(4-Aminobutyl)-3-(3,4-dihydroxyphenyl)propanamide	C13 H20 N2 O3	252.148	5.561		0.755	0.0449161
N-(3,4-Dihydroxyphenyl)glutamine	C11 H14 N2 O5	254.09	5.049		1.665	0.0146356
N-(1,3-Benzodioxol-5-ylcarbonyl)glycine	C10 H9 N O5	223.048	3.463		0.397	0.0493344
MFCD11045308	C29 H44 O2	424.334	24.076		0.518	0.0215651
MFCD02728197	C14 H20 N2 O4	280.142	4.475		0.636	0.00462418
MFCD00056707	C10 H10 O5	210.052	5.722		2.018	0.0298692
MFCD00025555	C9 H18 N2 O3	202.132	4.499		0.376	0.000447776
MFCD00025555	C9 H18 N2 O3	202.132	3.545		0.404	0.0034248
MFCD00025555	C9 H18 N2 O3	202.132	2.066		0.578	0.00405751
MFCD00025555	C9 H18 N2 O3	202.132	1.779		0.604	0.0227701
MFCD00025555	C9 H18 N2 O3	202.132	4.213		0.604	0.0331722
MFCD00025555	C9 H18 N2 O3	202.132	5.058		0.286	0.0375921
MFCD00016472	C15 H22 O3	250.157	6.256		0.378	0.0366274
MFCD00010474	C27 H44 O2	400.334	14.118		1.923	0.0499854
MFCD00009868	C16 H28 O2	252.209	24.59		0.512	0.0163934
metominostrobin	C16 H16 N2 O3	284.116	7.558		2.035	0.0134435
Methylone	C11 H13 N O3	207.09	3.132		0.516	0.0128359
METHYL PALMOXIRATE	C18 H34 O3	298.251	16.168		0.631	0.0275068
Methyl 3-isobutyryl-4-methyl-1,5-bis(3-methyl-2-buten-1-yl)-4-(4-methyl-3-penten-1-yl)-2-oxocyclohexanecarboxylate	C29 H46 O4	458.34	24.491		0.625	0.0138057
Methyl (2beta,3beta,4beta,5alpha,12beta,19alpha)-3,4,16-trihydroxy-1-methyl-6,7-didehydroaspidospermidine-3-carboxylate	C22 H28 N2 O5	400.2	6.279		0.43	0.0023307
methocarbamol	C11 H15 N O5	241.095	5.443		0.466	0.0316579
Methionylphenylalanine	C14 H20 N2 O3 S	296.12	5.582		0.716	0.0283814
metharbital	C9 H14 N2 O3	198.101	3.903		0.603	0.0236825
Metenolone enanthate	C27 H42 O3	414.314	21.747		0.494	0.010339
Mepivacaine	C15 H22 N2 O	246.173	8.681		0.164	0.0436764
Melatonin	C13 H16 N2 O2	232.121	5.448		0.332	0.000558826
Melatonin	C13 H16 N2 O2	232.121	5.043		0.603	0.00955326
melanostatin	C13 H24 N4 O3	284.185	4.916		0.366	0.0241061
Marimastat	C15 H29 N3 O5	331.211	5.424		0.657	0.0139256
Maraniol	C12 H12 O3	204.079	4.813		2.763	0.0229997
Lycocernuine	C16 H26 N2 O2	278.2	5.958		4.211	0.0188673
L-Isoleucine	C6 H13 N O2	131.095	2.567	73.3	1.344	0.0055219
Lisinopril	C21 H31 N3 O5	405.227	6.562		1.974	0.0227902
L-gamma-Glutamyl-L-leucine	C11 H20 N2 O5	260.137	3.504		0.636	0.0476448
Levodropropizine	C13 H20 N2 O2	236.153	4.788	61.1	0.43	0.0304071
Levetiracetam	C8 H14 N2 O2	170.106	4.509		0.519	0.0136132
Levetiracetam	C8 H14 N2 O2	170.106	4.276		0.703	0.0411697
leu-phe	C15 H22 N2 O3	278.163	5.823		0.536	0.00271769
Leu-Leu-Tyr	C21 H33 N3 O5	407.243	5.768		0.527	0.0258464
Leu-Leu	C12 H24 N2 O3	244.179	5.716		0.323	0.00851275
Leukotriene B4 Ethanolamide	C22 H37 N O4	379.272	21.747		3.568	0.0479001
Leucyltryptophan	C17 H23 N3 O3	317.174	6.529		0.397	0.036689
Leucyl-leucyl-norleucine	C18 H35 N3 O4	357.263	6.62		0.571	0.035983
Leucyl-leucyl-norleucine	C18 H35 N3 O4	357.263	6.465		0.597	0.0475411
Leucylasparagine	C10 H19 N3 O4	245.138	1.862		0.574	0.0467552
leucoline	C9 H7 N	129.058	12.559		0.345	0.0470819
lentiginosine	C8 H15 N O2	157.11	5.047		0.306	0.00703806
L-DIHYDROXYPHENYLALANINE	C9 H11 N O4	197.068	6.391		0.618	0.00654407
L-Alanyl-L-glutamine	C8 H15 N3 O4	217.107	2.886		0.385	0.00559878
Kynurenine	C10 H12 N2 O3	208.085	3.935		0.541	0.0207293
KG7967000	C28 H44 O3	428.329	22.781		0.478	0.00441041
Isopropyl unoprostone	C25 H44 O5	424.319	24.501		0.663	0.0180857
Isoprenaline	C11 H17 N O3	211.121	7.723		0.586	0.0112994
Isoniazid	C6 H7 N3 O	137.059	28.031		0.552	6.99629e-06
Irinotecan	C33 H38 N4 O6	586.279	11.33		4.083	0.0173144
Indole-3-carbidol	C9 H9 N O	147.069	7.656		0.479	0.00515736
Indane	C9 H10	118.079	6.177		0.726	0.0240022
hydroxyprogesterone caproate	C27 H40 O4	428.293	22.33		0.618	0.0358968
Hydroxycarteolol	C16 H24 N2 O4	308.174	7.02		0.631	0.0384175
Hydrocotarnine	C12 H15 N O3	221.105	4.71		0.735	0.0494087
Huperzine B	C16 H20 N2 O	256.158	5.728		0.491	0.0161501
Huperzine B	C16 H20 N2 O	256.158	8.628		3.367	0.0267165
Hopantenic acid	C10 H19 N O5	233.127	5.458		0.323	0.0291271
Hippuric acid	C9 H9 N O3	179.058	3.459		0.384	0.0127897
Hexylbenzene	C12 H18	162.141	24.199		0.643	0.0209614
Heptylbenzene	C13 H20	176.157	24.199		0.541	0.00171721
Hepadial	C12 H14 O4	222.089	4.804		4.11	0.0265917
Hecogenin	C27 H42 O4	430.309	25.281		0.799	0.0324347
GN6385000	C10 H8 O4	192.043	4.935		0.728	0.0193346
Gly-Tyr	C11 H14 N2 O4	238.095	3.877		0.669	0.0100964
Gly-Leu	C8 H16 N2 O3	188.115	1.783		0.584	0.018325
Glycyl-L-leucine	C8 H16 N2 O3	188.116	3.72	70	0.476	0.00433385
gitogenin	C27 H44 O4	432.324	26.594		0.669	0.0057886
GD3850000	C10 H7 N O2	173.048	5.9		1.839	0.034519
Flindersine	C14 H13 N O2	227.095	6.066		0.658	0.0275912
Fenspiride	C15 H20 N2 O2	260.153	8.482		0.541	0.027619
Famotidine	C8 H15 N7 O2 S3	337.045	4.498	86.4	0.794	0.0230309
FAFAR HS-50	C26 H42 O2	386.319	13.545		0.21	0.0417092
Eugenol	C10 H12 O2	164.084	24.499		0.52	0.00316399
Eugenol	C10 H12 O2	164.084	25.01		0.574	0.0133959
Etilevodopa	C11 H15 N O4	225.1	5.034		0.676	0.0429232
Ethyl Linoleate	C20 H36 O2	308.272	25.644		1.39	0.0161718
Ethamivan	C12 H17 N O3	223.121	4.838		0.464	0.034587
Estradiol undecylate	C29 H44 O3	440.33	27.903		0.588	0.0407768
EPININE	C9 H13 N O2	167.095	12.549		0.377	0.0456119
epi-jasmonic acid	C12 H18 O3	210.126	6.635		0.74	0.0386161
Endralazine	C14 H15 N5 O	269.127	6.102		0.231	0.0191475
Enalaprilat	C18 H24 N2 O5	348.168	8.84		2.058	0.0354412
Emorfazone	C11 H17 N3 O3	239.127	4.706		0.614	0.00725884
Eicosapentanoic acid	C20 H30 O2	302.225	24.206		0.532	0.00455523
Eicosapentanoic acid	C20 H30 O2	302.225	11.372		0.69	0.0240658
Eglumetad	C8 H11 N O4	185.068	1.225		0.637	0.0239386
Droxidopa	C9 H11 N O5	213.064	1.786		1.287	0.0256717
Drostanolone propionate	C23 H36 O3	360.267	14.712		0.72	0.0195843
Dropropizine	C13 H20 N2 O2	236.153	4.956	85.3	0.478	0.0105893
Drepamon	C16 H25 N O S	279.166	6.166		0.498	0.0118383
Docosatetraenoylethanolamide	C24 H41 N O2	375.314	26.578		2.442	0.0211357
DL-Ala-DL-Phe	C12 H16 N2 O3	236.116	5.389		0.448	0.00477836
DL-Ala-DL-Phe	C12 H16 N2 O3	236.116	5		0.4	0.00500917
DL-Ala-DL-Phe	C12 H16 N2 O3	236.116	4.478		0.672	0.010061
DL-2,6-Diaminopimelic acid	C7 H14 N2 O4	190.095	1.263		0.727	0.0410531
diphthinate	C13 H22 N4 O4	298.164	4.686		0.472	0.00237197
DINP	C26 H42 O4	418.308	8.628		2.228	0.0413103
Diaveridine	C13 H16 N4 O2	260.126	26.558		0.787	0.0343853
Diacetalol	C16 H24 N2 O4	308.174	5.617	70.2	0.385	0.0148529
D-Glucopyranuronic acid	C6 H10 O7	194.042	1.246		1.85	0.0446615
deacetylvindoline	C23 H30 N2 O5	414.216	8.576		0.307	0.0410509
danegaptide	C14 H17 N3 O4	291.122	5.602		0.546	0.00466732
CYCLO(-SER-TYR)	C12 H14 N2 O4	250.096	2.233		0.45	0.0170967
cyclo(dehydrophenylalanyl-L-leucyl)	C15 H18 N2 O2	258.137	7.574		1.469	0.0278574
Cumene	C9 H12	120.094	6.205		0.606	0.0454402
Corchorifatty acid F	C18 H32 O5	328.225	11.332	72	0.468	0.0031987
cis-12-Octadecenoic acid methyl ester	C19 H36 O2	296.272	26.822	84.2	0.312	0.0348786
Choline	C5 H13 N O	103.1	1.212	76	2.35	0.0170826
CETABEN	C23 H39 N O2	361.298	11.569		0.567	0.0312966
Celestolide	C17 H24 O	244.183	24.2		0.576	0.0183275
Carteolol	C16 H24 N2 O3	292.179	12.558		0.336	0.0481354
cartazolate	C15 H22 N4 O2	290.173	5.461		0.467	0.010072
Cardanolide	C23 H36 O2	344.272	24.989		0.73	0.0251446
Cardanolide	C23 H36 O2	344.272	15.882		0.629	0.0485401
Capryloylglycine	C10 H19 N O3	201.137	3.874		0.252	0.00474762
Capryloylglycine	C10 H19 N O3	201.137	3.573		0.506	0.0171372
Camphorsulfonic acid	C10 H16 O4 S	232.077	5.916		3.038	0.027104
Caffeic acid	C9 H8 O4	180.042	5.948	87	2.228	0.0287977
C7-HSL	C11 H19 N O3	213.137	6.607		0.325	0.0323325
C7-HSL	C11 H19 N O3	213.137	4.578		0.378	0.0377203
C4-Carnitine	C11 H21 N O4	231.147	3.701		0.136	0.0242051
Butenylcarnitine	C11 H19 N O4	229.131	6.795		0.584	0.0238872
Brassylic acid	C13 H24 O4	244.167	6.44		0.213	0.0375239
Bolandiol dipropionate	C24 H36 O4	388.262	23.187		0.55	0.0371803
Betahistine	C8 H12 N2	136.1	1.775		0.617	0.0353809
Atenolol acid	C14 H21 N O4	267.147	5.274	75.1	0.604	0.0072521
ATEE	C13 H17 N O4	251.116	6.12		0.201	0.00552632
ATEE	C13 H17 N O4	251.116	5.323		0.519	0.0312867
Aspartame	C14 H18 N2 O5	294.122	4.33	68.9	0.615	0.0106634
asn-trp	C15 H18 N4 O4	318.132	26.551		0.768	0.0348274
asn-leu	C10 H19 N3 O4	245.138	4.694		1.727	0.0471747
Asarone	C12 H16 O3	208.11	6.203		0.556	0.0369828
Arginyltyrosine	C15 H23 N5 O4	337.175	2.151		0.802	0.0487898
Arecoline	C8 H13 N O2	155.095	5.04	78.8	0.426	0.0390353
Arabinosylhypoxanthine	C10 H12 N4 O5	268.081	3.911		0.361	0.00994759
apronalide	C9 H16 N2 O2	184.121	6.194		0.528	0.00945715
apronalide	C9 H16 N2 O2	184.121	3.747		0.456	0.0259789
Aprobarbital	C10 H14 N2 O3	210.1	5.054		1.893	0.0387547
Aprobarbital	C10 H14 N2 O3	210.101	6.386		0.764	0.048408
APM	C7 H13 N O4	175.084	3.992		2.688	0.0377902
Anhalamine	C11 H15 N O3	209.105	4.458		0.514	0.0116448
Anhalamine	C11 H15 N O3	209.105	5.896		0.67	0.0159808
Ancymidol	C15 H16 N2 O2	256.121	7.518		1.297	0.019552
Aminoacetic 3-(4-hydroxy-3-methoxyphenyl)propanoic anhydride	C12 H15 N O5	253.095	4.786		0.692	0.0497022
Allyxycarb	C16 H22 N2 O2	274.168	20.678		0.505	0.00666604
Ala-Tyr	C12 H16 N2 O4	252.111	3.878		0.613	0.00366374
Ala-Tyr	C12 H16 N2 O4	252.111	4.849		0.686	0.0499272
adrenaline	C9 H13 N O3	183.09	7.263		0.527	0.0206075
Acanthicifoline	C10 H12 N2 O2	192.09	4.852		0.562	0.028871
A-12(13)-EpODE	C18 H30 O3	294.22	20.044		0.598	0.010329
A-12(13)-EpODE	C18 H30 O3	294.22	18.497		0.64	0.0120347
a Jasmonoyl-glutamine	C17 H26 N2 O5	338.184	8.688		0.228	0.0348634
9,10-Dihydroxystearic acid	C18 H36 O4	316.262	19.665		0.364	0.0181273
9,10-Dihydroxystearic acid	C18 H36 O4	316.261	7.691		3.169	0.0190833
8-Hydroxyhexadecanedioic acid	C16 H30 O5	302.21	9.875		0.571	0.0370604
8-deoxylactucin	C15 H16 O4	260.105	8.341		6.259	0.00486952
7-ketodeoxycholic acid	C24 H38 O5	406.272	7.719		0.712	0.0476684
7alpha-Hydroxy-3-oxochol-4-en-24-oic acid	C24 H36 O4	388.262	21.297		0.699	0.0285157
7-[3-(Ethylamino)phenyl]pyrazolo[1,5-a]pyrimidine-3-carbonitrile	C15 H13 N5	263.116	4.46		0.553	0.00676191
7-[3-(Ethylamino)phenyl]pyrazolo[1,5-a]pyrimidine-3-carbonitrile	C15 H13 N5	263.116	5.464		0.868	0.0342294
6-Oxo-pipecolinic acid	C6 H9 N O3	143.058	1.434		0.629	0.0208601
6-Hydroxy-5-methyl-4,11-dioxoundecanoic acid	C12 H20 O5	244.131	5.404		0.369	0.00966923
6-Acetamido-2-oxohexanoic acid	C8 H13 N O4	187.085	1.783		0.644	0.0247685
6-Acetamido-2-oxohexanoic acid	C8 H13 N O4	187.085	1.327		0.746	0.0257515
6-Acetamido-2-oxohexanoic acid	C8 H13 N O4	187.084	5.642		1.242	0.036115
6627	C10 H13 N O4	211.084	7.395		0.218	0.0180278
6-{3-(2-Carboxyethyl)-4-methyl-5-[(3-methyl-5-oxo-4-vinyl-2,5-dihydro-1H-pyrrol-2-yl)methyl]-1H-pyrrol-2-yl}-2-{[5-formyl-3-(2-hydroxyethyl)-4-methyl-1H-pyrrol-2-yl]methyl}-3-methyl-4-oxo-1,4,5,6-tetr ahydrocyclopenta[b]pyrrole-5-carboxylic acid	C34 H38 N4 O8	630.27	12.051		0.264	0.0061819
6-(1-Hydroxyethyl)-3-(hydroxymethyl)-2,7-dioxabicyclo[4.1.0]hept-3-en-5-one	C8 H10 O5	186.052	1.782		0.55	0.0296538
6-(1-Hydroxyethyl)-3-(hydroxymethyl)-2,7-dioxabicyclo[4.1.0]hept-3-en-5-one	C8 H10 O5	186.052	1.394		0.655	0.034549
6-(1H-Pyrrol-1-yl)norleucine	C10 H16 N2 O2	196.121	3.96		0.608	0.0410772
5-O-methyl embelin	C18 H28 O4	308.199	19.251		0.573	0.0343329
5-Methoxyindole	C9 H9 N O	147.069	6.649	61.2	0.393	0.0259514
5-Methoxy-3-indoleaceate	C11 H11 N O3	205.074	3.799		0.51	0.0474558
5-hydroxypipecolic acid	C6 H11 N O3	145.074	4.272		0.78	0.00950129
5-Hydroxyindole-3-acetic acid	C10 H9 N O3	191.058	5.902	90.8	2.043	0.0316588
5-Hydroxy-10,10-dimethyl-6-methylenebicyclo[7.2.0]undecan-2-one	C14 H22 O2	222.162	24.192		0.546	0.00635446
4-Methylbenzaldehyde	C8 H8 O	120.058	2.624		2.602	0.000345395
4-Hexyloxyaniline	C12 H19 N O	193.147	5.67	74.7	0.518	0.0129767
4beta-methylzymosterol-4-carbaldehyde	C29 H46 O2	426.35	25.261		0.825	0.0131318
4-amino-2-hydroxyamino-6-nitrotoluene	C7 H9 N3 O3	183.065	1.332		1.637	0.0297701
4-Acetyl-1,3-benzoxazol-2(3H)-one	C9 H7 N O3	177.042	5.92		2.082	0.0192062
4230434	C6 H12 N2 O	128.095	1.376		0.612	0.0370218
4149853	C21 H41 N O4	371.304	19.105		0.589	0.0403338
4,5-Dihydroxyphthalic acid	C8 H6 O6	198.016	4.301		5.804	0.029433
4',5,7-TRIMETHOXYFLAVONE	C18 H16 O5	312.1	7.388		0.472	0.0439737
4-(METHYLNITROSAMINO)-1-(3-PYRIDYL-N-OXIDE)-1-BUTANOL	C10 H15 N3 O3	225.112	4.828		0.294	0.017152
4-(4-Hydroxyphenyl)-L-allothreonine	C10 H13 N O4	211.085	3.335		0.702	0.0431666
4-(1,2-Dihydroxy-2-propanyl)-1-methyl-1,2-cyclohexanediol	C10 H20 O4	204.136	5.777		0.381	0.0163709
3-Tropanol	C8 H15 N O	141.116	7.052		2.065	0.0210533
3-Methylenenorleucine	C7 H13 N O2	143.095	4.389		0.275	0.0249648
3-Methylenenorleucine	C7 H13 N O2	143.095	4.511		0.241	0.0394218
3-Methyladenine	C6 H7 N5	149.07	1.324		0.518	0.0105899
3-Methoxytyramine-betaxanthin	C18 H20 N2 O6	360.132	7.118		1.85	0.0303014
3-Hydroxy-4-methylcholesta-8,24-diene-4-carbaldehyde	C29 H46 O2	426.35	24.985		0.662	0.0010235
3-Hydroxy-4-methylcholesta-8,24-diene-4-carbaldehyde	C29 H46 O2	426.35	24.542		0.451	0.0110581
3beta-hydroxy-5alpha-cholest-8-ene-4alpha-carboxylic acid	C28 H46 O3	430.345	24.436		0.581	0.0179931
3beta-Hydroxy-5alpha-cholest-7-ene-4alpha-carboxylate	C28 H46 O3	430.345	25.262		0.434	0.0332023
3beta-hydroxy-4beta-methyl-5alpha-cholest-8-ene-4alpha-carboxylic acid	C29 H48 O3	444.361	25.083		0.597	0.00295171
3beta-hydroxy-4beta-methyl-5alpha-cholest-8-ene-4alpha-carboxylic acid	C29 H48 O3	444.361	27.631		0.792	0.0434176
3a,7a-Dihydroxy-5b-cholestan-26-oic acid	C27 H46 O4	434.34	24.644		0.576	0.0239539
3477	C12 H20 N2 O3	240.147	3.738		0.855	0.0490738
3082	C13 H24 O	196.183	22.199		0.715	0.0123526
3-[(3-Hydroxytridecanoyl)oxy]-4-(trimethylammonio)butanoate	C20 H39 N O5	373.283	7.354		0.781	0.0377408
3-[(3-Hydroxyheptanoyl)oxy]-4-(trimethylammonio)butanoate	C14 H27 N O5	289.189	6.119		0.237	0.0435254
3-[(2Z)-1-Oxo-2-buten-2-yl]pentanedioic acid	C9 H12 O5	200.068	24.153		0.882	0.0146066
3-[(2-Isopropyl-5-methylcyclohexyl)oxy]-2-methyl-1,2-propanediol	C14 H28 O3	244.204	20.266		0.539	0.0357913
3,8,9-trihydroxy-10-propyl-3,4,5,8,9,10-hexahydro-2H-oxecin-2-one	C12 H20 O5	244.131	6.204	77	0.64	0.0365423
3,4-Dimethoxyphenethylamine	C10 H15 N O2	181.11	8.684		0.236	0.0467387
3,4,5-Trihydroxy-1-cyclohexenecarboxylic acid	C7 H10 O5	174.052	4.296		0.531	0.0490027
3-(6-hydroxyindol-3-yl)lactic acid	C11 H11 N O4	221.069	5.191		0.538	0.0421869
3-(6-Amino-1H-purin-1-yl)-1-propanol	C8 H11 N5 O	193.097	2.207		0.633	0.0263311
3-(6,7-Dimethoxy-1,3-benzodioxol-5-yl)-3-hydroxypropanal	C12 H14 O6	254.079	6.479		0.472	0.046018
3-(2-Hydroxyethyl)-1H-indol-5-yl alpha-D-glucopyranoside	C16 H21 N O7	339.132	1.326		0.571	0.0376906
3-(1-Hydroxyethyl)-4a,5-dimethyl-4a,5,6,7,8,8a-hexahydro-2(1H)-naphthalenone	C14 H22 O2	222.162	6.997		0.745	0.0442516
2-Propionyl-1,4,5,6-tetrahydropyridine	C8 H13 N O	139.1	5.008		0.684	0.0249215
2-Methoxy-phloroglucinol	C7 H8 O4	156.042	24.161		0.722	0.00488075
2-Ethyl-2-phenylmalonamide	C11 H14 N2 O2	206.106	4.571		0.351	0.0143302
2'-Deoxyinosine	C10 H12 N4 O4	252.086	1.344	75	0.553	0.0161173
2'-Deoxycytidine	C9 H13 N3 O4	227.091	3.796		0.334	0.0095664
2-Amino-9,10-epoxy-8-oxodecanoic acid	C10 H17 N O4	215.116	5.412		0.352	0.0118066
2-Amino-9,10-epoxy-8-oxodecanoic acid	C10 H17 N O4	215.116	1.326		0.839	0.0391732
2-Amino-5-oxo-7-[(2-oxoethyl)amino]heptanoic acid	C9 H16 N2 O4	216.111	4.887		3.062	0.00610432
2-Amino-1,3,4-octadecanetriol	C18 H39 N O3	317.293	11.883	95.3	1.382	0.0346998
2-Acetyl-6-hydroxy-7-(hydroxymethyl)-1,5,6,7-tetrahydro-4H-azepin-4-one	C9 H13 N O4	199.084	4.476		0.705	0.0458678
2-Acetyl-1-pyrroline	C6 H9 N O	111.069	4.491		0.517	0.0137222
2-Acetamidooctanoic acid	C10 H19 N O3	201.137	4.048		0.5	0.0437348
2-Acetamido-1,5-anhydro-2-deoxy-3-O-beta-D-galactopyranosyl-D-arabino-hex-1-enitol	C14 H23 N O10	365.133	3.58		0.226	0.000338606
219682	C7 H8 N4 O3	196.06	4.028		0.603	0.0146133
2145	C8 H8 O2	136.053	6.51		1.806	0.0266561
2-[3-carboxylato-3-(methylammonio)propyl]-L-histidine dizwitterion	C11 H18 N4 O4	270.133	2.276		0.554	0.0307629
2-[(8E,11E,14Z)-8,11,14-Heptadecatrien-1-yl]-6-hydroxybenzoic acid	C24 H34 O3	370.251	23.102		1.874	0.0388731
2-[(5Z)-5-Tetradecen-1-yl]cyclobutanone	C18 H32 O	264.245	26.816		0.303	0.0310829
2,5-Dimethyl-4-(1-pyrrolidinyl)-3(2H)-furanone	C10 H15 N O2	181.111	3.37		0.778	0.0291462
2,4-dihydroxyheptadec-16-enyl acetate	C19 H36 O4	328.262	27.887		0.462	0.0187039
2,3-Dimethoxy-5-methyl-6-[(2E,6E,10E)-3,7,11,15-tetramethyl-2,6,10,14-hexadecatetraen-1-yl]-1,4-benzenediol	C29 H44 O4	456.324	17.345		0.585	0.0445808
2,3-Diaminosalicylic acid	C7 H8 N2 O3	168.053	5.362		0.496	0.0146824
2-(Ethylamino)-4,5-dihydroxybenzamide	C9 H12 N2 O3	196.085	3.926		0.376	0.0226485
1886839	C20 H30 O4	334.215	22.325		0.317	0.0480402
1872050	C12 H23 N O3	229.168	5.286		0.473	0.0333085
1801426	C20 H39 N O3	341.293	27.16		1.075	0.0318845
1722018	C7 H15 N O2	145.11	4.824		0.67	0.0473259
13-hydroxy-alpha-tocopherol	C29 H50 O3	446.376	24.302		0.444	0.00325107
12-oxo Phytodienoic Acid	C18 H28 O3	292.204	22.441	73.4	0.731	0.00982276
12,22-Dihydro-2H,3H-porphine	C20 H16 N4	312.136	6.79		1.403	0.0357806
12,13-Epoxytrichothec-9-ene-3,4,15-triol	C15 H22 O5	282.147	8.434		1.233	0.0365979
11343172	C11 H21 N O3	215.152	7.857		1.586	0.0449383
1-{[(Z)-(3-Methyl-1,3-dihydro-2H-imidazo[4,5-f]quinolin-2-ylidene)amino]oxy}ethanone	C13 H12 N4 O2	256.095	26.536		0.859	0.0499746
1,7-Dihydroxy-6,6-dimethyl-3,5,5a,6,7,8,9a,9b-octahydronaphtho[1,2-c]furan-9(1H)-one	C14 H20 O4	252.136	8.498		0.522	0.027237
1,2,3,4-tetrahydro-beta-carboline-3-carboxylic acid	C12 H12 N2 O2	216.09	5.777		2.879	0.0438641
1-(Propylthio)propyl propyl disulfide	C9 H20 S3	224.072	5.239		0.422	0.0369588
1-(4-Hydroxy-3-methoxyphenyl)-3,5-decanediyl diacetate	C21 H32 O6	380.22	8.609		4.868	0.0499073
{2-[2-(Isobutyryloxy)-4-methylphenyl]-2-oxiranyl}methyl 2-methylbutanoate	C19 H26 O5	334.178	8.455		0.561	0.00814789
(S)-2-hydrazino-3-(4-hydroxy-3-methoxyphenyl)-2-methylpropionic acid	C11 H16 N2 O4	240.111	6.05		0.501	0.0494749
(R)-Salsolinol	C10 H13 N O2	179.095	5.303		0.625	0.00245651
(R)-Salsolinol	C10 H13 N O2	179.095	7.649		0.503	0.0319754
(E)-p-coumaric acid	C9 H8 O3	164.047	6.685		1.526	0.0137075
(9S,13S)-12-Oxophytodienoic acid	C18 H28 O3	292.204	21.609		0.367	0.0326897
(9S,10E,12Z,15Z)-9-Hydroperoxy-10,12,15-octadecatrienoic acid	C18 H30 O4	310.215	20.518		0.894	0.00984327
(9S,10E,12Z,15Z)-9-Hydroperoxy-10,12,15-octadecatrienoic acid	C18 H30 O4	310.215	21.612		0.707	0.0294376
(9S,10E,12Z,15Z)-9-Hydroperoxy-10,12,15-octadecatrienoic acid	C18 H30 O4	310.215	15.133		0.598	0.0337926
(6S)-2,6-Anhydro-6-[(1S)-2-isopropyl-5-methylcyclohexyl]-L-gulonic acid	C16 H28 O6	316.189	8.74		0.542	0.0420191
(6R,10S)-13-[(2S)-6-Hydroxy-2,5,7,8-tetramethyl-3,4-dihydro-2H-chromen-2-yl]-2,6,10-trimethyltridecanoic acid	C29 H48 O4	460.356	27.855		0.617	0.00341057
(5Z)-5-[(1,6-Dihydroxy-2,4-cyclohexadien-1-yl)imino]-5-hydroxy-L-norvaline	C11 H16 N2 O5	256.106	3.864		0.515	0.00162449
(4Z,6E)-1,7-Diphenyl-4,6-heptadien-3-one	C19 H18 O	262.136	6.236		0.362	0.0280698
(4S)-6-Methyl-2-oxa-6-azatricyclo[3.3.1.0~3,7~]nonan-4-ol	C8 H13 N O2	155.095	1.334		0.785	0.0306785
(4R,5S,9S,10R,12S,13S)-1,5,9-Trimethyl-11,14,15,16-tetraoxatetracyclo[10.3.1.0~4,13~.0~8,13~]hexadecan-10-ol	C15 H24 O5	284.163	6.984		0.577	0.0202309
(4E)-2-[(Carboxymethyl)amino]-4-octenoic acid	C10 H17 N O4	215.116	2.243		0.507	0.022721
(3S)-3-{[(2E)-4-Carboxy-2-butenoyl]oxy}-4-(trimethylammonio)butanoate	C12 H19 N O6	273.121	1.791		0.635	0.0293089
(3S)-3-{(Z)-[(3S)-3-{(Z)-[(3R)-3-Amino-1-hydroxy-4-methylpentylidene]amino}-1-hydroxybutylidene]amino}-5-methylhexanoic acid	C17 H33 N3 O4	343.247	6.838		0.311	0.00228414
(3S)-3-{(Z)-[(3S)-3-{(Z)-[(3R)-3-Amino-1-hydroxy-4-methylpentylidene]amino}-1-hydroxybutylidene]amino}-5-methylhexanoic acid	C17 H33 N3 O4	343.247	5.924		0.591	0.016127
(3S)-3-{(Z)-[(3S)-3-{(Z)-[(3R)-3-Amino-1-hydroxy-4-methylpentylidene]amino}-1-hydroxybutylidene]amino}-5-methylhexanoic acid	C17 H33 N3 O4	343.247	6.194		0.775	0.0251357
(3E)-2,6-Dihydroxy-3-(1H-imidazol-5-ylmethylene)-7a-(2-methyl-3-buten-2-yl)-7a,12-dihydro-3H,5H-imidazo[1',2':1,2]pyrido[2,3-b]indol-5-one	C22 H21 N5 O3	403.163	6.674		1.593	0.0470824
(3beta,5xi,9xi,22beta)-3,24-Dihydroxy-22,29-epoxyoleana-11,13(18)-dien-29-one	C30 H44 O4	468.324	22.371		1.28	0.0482642
(2S,4S)-4-hydroxy-2,3,4,5-tetrahydrodipicolinic acid	C7 H9 N O5	187.047	4.353		0.632	0.00888058
(2S)-6-Amino-2-[(E)-(hydroxymethylene)amino]hexanimidic acid	C7 H15 N3 O2	173.117	3.197		0.202	0.0278579
(2S)-2-Amino-8-hydroxyoctanoic acid	C8 H17 N O3	175.121	1.329		0.393	0.0156197
(2S)-2-[(3E,7E,11E)-13-Hydroxy-4,8,12-trimethyl-3,7,11-tridecatrien-1-yl]-2,7,8-trimethyl-6-chromanol	C28 H42 O3	426.313	24.487		0.656	0.022849
(2R,3S)-3-Hydroxy-8-methyl-8-azabicyclo[3.2.1]octane-2-carboxylic acid	C9 H15 N O3	185.105	1.334		0.674	0.0122313
(2R,3S)-3-Hydroxy-8-methyl-8-azabicyclo[3.2.1]octane-2-carboxylic acid	C9 H15 N O3	185.105	1.785		0.636	0.0293876
(2R,3R,10S,12R)-2-Allyl-1,8-diazatetracyclo[8.3.1.0~3,8~.0~3,12~]tetradec-4-en-7-one	C15 H20 N2 O	244.158	7.264		0.256	0.0414708
(2R)-2-Hydroxy-3-(phosphonooxy)propyl (9Z)-9-tetradecenoate	C17 H33 O7 P	380.195	7.889		0.299	0.0198552
(2R)-2-[(3Z,7E,11Z)-13-Hydroxy-4,8,12-trimethyl-3,7,11-tridecatrien-1-yl]-2,5,7,8-tetramethyl-6-chromanol	C29 H44 O3	440.329	24.486		0.635	0.0101448
(2E,4Z)-methyl 2,4-decadienoate	C11 H18 O2	182.131	23.565		1.3	0.0229445
(1Z)-N-[(3Z)-3-(Heptylimino)-3-hydroxypropyl]-2,4-dihydroxy-3,3-dimethylbutanimidic acid	C16 H32 N2 O4	316.237	6.149		0.297	0.032938
(1S,4R,5R,6R,6aS,9S,9aE,10aR)-1,5-Dihydroxy-3-isopropyl-9-(methoxymethyl)-6,10a-dimethyl-1,2,4,5,6,6a,7,8,9,10a-decahydrodicyclopenta[a,d][8]annulen-4-yl alpha-D-glucopyranoside	C27 H44 O9	512.3	9.211		0.093	0.0387251
(1S,4R,4'S,5'S,6'R,9S,10E,12E,14S,15S,16E,19R,21R)-4',9,15-Trihydroxy-6'-isopropyl-5',6,10,14,16-pentamethyl-3',4',5',6'-tetrahydro-3H,7H-spiro[2,20-dioxatricyclo[17.3.1.0~4,9~]tricosa-5,10,12,16-tetr aene-21,2'-pyran]-3,7-dione	C33 H48 O8	572.334	20.034		0.067	0.0277397
(1R,7R,10R)-4,10,11,11-Tetramethyl-3-methylenetricyclo[5.3.1.0~1,5~]undec-4-ene	C16 H24	216.188	24.198		0.792	0.0181995
(1R,4aS,5R,8aS)-5-(5-hydroxy-3-methylpentyl)-1,4a-dimethyl-6-methylidene-decahydronaphthalene-1-carboxylic acid	C20 H34 O3	322.251	24.38	73.1	0.481	0.0355804
(+)-sesamin monocatechol	C19 H18 O6	342.11	6.825		5.648	0.0481109
(+)-Ophiobolin A	C25 H36 O4	400.261	24.242		0.756	0.00400506
(-)-pinellic acid	C18 H34 O5	330.24	7.622		2.373	0.0115777
(-)-carnegine	C13 H19 N O2	221.142	6.053		0.719	0.0313272
(-)-Brucine	C23 H26 N2 O4	394.19	6.622		6.203	0.0206679
	C13 H26 N2 O3	258.195	6.736		0.26	1.54068e-06
	C13 H25 P S	244.142	6.199		6.609	4.54265e-06
	C14 H21 N7 O	303.18	5.663		0.418	0.000234936
	C14 H20	188.157	24.208		0.424	0.000258782
	C13 H28 N6 S	300.209	24.821		0.514	0.000299147
	C14 H27 N O2 S	273.176	9.125		3.245	0.000360157
	C14 H24 N2 O5	300.169	4.666		0.397	0.00041101
	C8 H16 N2 O2	172.121	4.335		0.435	0.000461658
	C21 H46 N3 O4 P S2	499.269	9.384		0.13	0.000476709
	C23 H42 N2 O	362.33	22.207		5.364	0.000697914
	C14 H28 N O5 P	321.169	4.871		0.629	0.000794906
	C28 H38 N O P3	497.216	9.016		2.463	0.000871968
	C34 H69 N3 O12 P2	773.437	14.544		0.097	0.000884353
	C12 H19 N4 O4 P	314.115	6.497		3.509	0.000921327
	C25 H43 N5 O2 S	477.315	22.331		2.257	0.000955638
	C17 H33 N2 O6 P	392.206	6.451		0.51	0.000975527
	C22 H36 O S3	412.192	7.918		4.501	0.000976042
	C22 H51 N4 O7 P	514.348	5.133		0.358	0.000977501
	C42 H65 N O12	775.453	14.538		0.021	0.00103733
	C26 H36 N4	404.293	25.407		0.543	0.00107667
	C27 H38 N4 O3 S	498.266	27.101		0.23	0.0010781
	C28 H46 O5	462.335	19.306		0.339	0.00111877
	C8 H18 Cl N5 O4	283.106	4.589		0.282	0.00112678
	C29 H50 O4	462.372	25.057		0.57	0.00122567
	C16 H22 N2 O4	306.158	6.792		0.45	0.00124877
	C32 H70 N6 O11 P2	776.455	14.536		0.072	0.0012567
	C13 H24 N2 O4	272.174	5.705		0.509	0.00127081
	C21 H38 N7 O4 P	483.274	14.54		0.042	0.00128309
	C42 H63 N O12	773.437	14.319		0.066	0.001382
	C17 H29 N3 O6	371.206	5.967		0.453	0.00140555
	C41 H66 N3 O9 P	775.453	14.314		0.029	0.00145037
	C16 H36 N7 O4 P	421.258	6.927		0.321	0.00157762
	C22 H43 N4 O3 P	442.309	25.815		0.174	0.0017206
	C9 H21 N8 P S	304.135	8.347		0.45	0.00177301
	C15 H33 N6 O5 P	408.226	7.682		0.164	0.00179434
	C19 H30 N2 O9	430.195	2.846		3.399	0.00183321
	C42 H62 N7 O5 P	775.453	14.116		0.041	0.00186314
	C27 H37 N3 O5	483.274	14.313		0.026	0.00187346
	C23 H47 N4 O4 P	474.333	27.859		0.754	0.00190146
	C11 H33 N8 O4 P	372.238	6.237		0.464	0.00190873
	C41 H64 N3 O9 P	773.437	8.064		0.056	0.00194509
	C26 H40 N5 O4 P	517.279	7.556		0.122	0.00201027
	C53 H69 N9 O8 S	991.498	5.492		0.232	0.00202753
	C20 H28 N4 O2 S	388.193	7.358		0.367	0.00204954
	C29 H40 N4 O2	476.314	24.192		0.586	0.00226966
	C22 H43 N4 O3 P	442.309	21.032		0.27	0.00240519
	C7 H21 N7 O5 S	315.132	3.971		0.47	0.00245131
	C17 H26	230.204	24.204		0.541	0.00253835
	C34 H45 N5	523.367	24.299		0.473	0.00261423
	C29 H46 N4 O3	498.356	21.612		0.521	0.00273289
	C5 H17 N4 O3 P	212.105	6.224		0.538	0.00289298
	C23 H49 N4 O2 P	444.361	25.932		0.547	0.00294139
	C30 H40 N4 O2	488.314	9.689		3.914	0.0032968
	C23 H53 N4 O3 P	464.387	24.308		0.451	0.00336205
	C22 H40 N9 O P S	509.282	6.463		3.071	0.00355109
	C8 H19 N6 O4 P	294.122	3.659		0.769	0.00357102
	C12 H13 N7	255.122	3.691		0.53	0.00369531
	C23 H47 N O2	369.361	25.616		0.464	0.00376777
	C16 H27 N O2 S2	329.148	1.323		0.539	0.00381671
	C34 H51 N2 O3 P S	598.337	6.754		0.284	0.00400466
	C15 H23 N5 O2	305.184	5.421		0.505	0.00402496
	C15 H42 N9 O P S2	459.269	5.126		0.241	0.00404604
	C14 H32 N5 O4 P	365.22	6.985		0.196	0.00405204
	C30 H44 N4 O	476.351	24.49		0.65	0.00407358
	C26 H53 N2 O10 P	584.344	5.322		0.081	0.00425525
	C17 H39 N5 O4 P2	439.247	14.037		0.135	0.00425786
	C21 H28 N10 S	452.223	8.594		2.742	0.00432865
	C14 H29 N3 O3 P2	349.167	5.528		0.297	0.00467803
	C27 H46 O6 S	498.302	21.994		2.906	0.00468013
	C8 H22 N9 O4 P	339.153	1.324		0.582	0.00471655
	C8 H4 O3	148.016	5.881		2.345	0.00487199
	C22 H49 N4 O4 P	464.351	22.756		0.45	0.00491529
	C18 H15 N5 O	317.126	5.791		2.074	0.00501792
	C20 H40 N2 O4	372.299	12.354		3.565	0.00503983
	C14 H29 N O2 S	275.192	10.408		1.756	0.00510194
	C22 H34 N4 O3	402.263	5.622		2.579	0.00517789
	C16 H31 N3 O5	345.227	5.907		0.478	0.00519795
	C19 H39 N O2	313.298	26.441		2.284	0.00522813
	C22 H40 N2 O3	380.304	9.419		0.461	0.00526543
	C19 H35 N8 P	406.272	11.603		0.423	0.00532752
	C30 H63 N4 O4 P	574.46	26.684		0.456	0.00533846
	C21 H39 N5	361.319	12.169		1.568	0.00540005
	C13 H21 N6 O4 P	356.135	7.559		1.925	0.00544512
	C27 H37 N3 O5	483.274	14.114		0.046	0.00544936
	C14 H28 O5	276.194	7.009		0.176	0.00568671
	C10 H32 N10 O3 S	372.238	6.767		0.313	0.00568906
	C25 H40 N8	452.337	6.121		2.206	0.00585021
	C15 H32 O11	388.196	3.574		0.585	0.00589805
	C23 H49 N4 O2 P	444.361	24.661		0.46	0.00591763
	C37 H70 N5 O4 P3 S	773.437	14.11		0.203	0.00603352
	C13 H14 N4 O6	322.09	3.776		0.43	0.00603866
	C20 H28 N4 O2 S	388.193	7.605		0.221	0.00624212
	C11 H13 N3 O S2	267.051	1.204		0.374	0.00627904
	C18 H35 N4 O2 P	370.251	12.347		0.408	0.0062794
	C19 H40 N2 O7 S	440.255	22.332		0.288	0.00637058
	C24 H39 N O2	373.298	25.492		2.394	0.00638378
	C10 H24 N5 O2 P	277.167	5.331		0.086	0.00648009
	C11 H19 N3 O4	257.138	1.33		0.569	0.00669422
	C9 H22 N9 P S2	351.117	1.324		0.431	0.0067587
	C18 H35 N O2 S	329.239	16.323		1.691	0.0068039
	C25 H42 N3 O2 P S	479.275	6.826		0.329	0.00693184
	C21 H34 N O6 P	427.211	7.269		0.219	0.00693702
	C26 H47 N6 O5 P	554.334	5.328		0.076	0.00694429
	C25 H34 N4	390.277	24.822		0.71	0.00699265
	C23 H25 N7 O2	431.205	7.746		0.258	0.00700894
	C17 H38 O2 P2 S3	432.15	5.927		1.594	0.00705743
	C17 H33 N S2	315.205	6.118		0.268	0.00718916
	C25 H46 O6 S2	506.271	27.893		0.334	0.00723368
	C20 H41 N4 O P	384.303	21.759		0.395	0.00730134
	C16 H42 N9 O4 P	455.31	9.304		0.42	0.00735898
	C4 H3 N3 O	109.028	3.91		0.38	0.00741174
	C20 H43 N4 O4 P	434.304	21.625		0.286	0.00744033
	C23 H47 N4 O P	426.35	16.407		0.477	0.0074623
	C24 H38 N2 O3	402.289	16.698		0.292	0.00751005
	C31 H45 N6 O P	548.337	18.886		0.139	0.00758954
	C28 H42 N4 O3 S	514.297	8.73		2.46	0.00765455
	C24 H45 N8 O P	492.346	22.18		0.463	0.00775279
	C23 H43 N8 O4 P	526.316	10.887		0.229	0.00775707
	C3 H9 N4 O2 P	164.047	6.769		4.799	0.0078166
	C29 H40 N4 O	460.319	21.048		0.321	0.00782996
	C20 H31 N3 O5	393.227	6.951		0.345	0.00797242
	C9 H20 N5 O5 P	309.122	4.461		0.564	0.00799655
	C9 H17 N3 O2	199.132	3.852		0.685	0.00819493
	C12 H22 N2 O3	242.163	4.144		0.626	0.00825476
	C13 H20 O7	288.121	26.548		0.733	0.00827576
	C16 H28 O2 S	284.181	13.051		2.234	0.0083375
	C16 H36 Cl N5	333.267	22.305		1.654	0.00835287
	C17 H33 N10 O4 P	472.241	7.685		0.24	0.00839164
	C16 H32 N P S2	333.172	5.554		0.575	0.00842321
	C13 H27 N6 O4 P	362.184	5.203		0.513	0.00845956
	C31 H46 O8	546.321	13.402		0.269	0.00850527
	C18 H18 O8 S	394.073	6.98		4.09	0.0085493
	C26 H33 O8 P S	536.162	3.966		0.162	0.00862217
	C21 H42 N6 O S	426.313	27.174		0.345	0.00878501
	C5 H8 N6 O4	216.061	1.305		0.421	0.00885415
	C7 H20 N10 O3	292.172	5.324		0.094	0.00909989
	C13 H20 O7 S	320.093	6.488		0.231	0.00915506
	C6 H12 N5 O5 P	265.059	4.425		0.739	0.00946435
	C14 H25 N6 O4 P	372.169	6.605		0.507	0.0094742
	C18 H35 N2 O P S	358.222	4.027		0.376	0.0094743
	C23 H38 N O7 P	471.237	7.689		0.262	0.00948272
	C22 H28 N6 O2	408.228	7.671		0.294	0.00963835
	C19 H41 N4 O2 P	388.298	24.607		0.418	0.00974039
	C10 H19 N3 O3	229.143	3.73		0.401	0.00980801
	C8 H10 N2 O2	166.074	5.785		0.671	0.00989559
	C10 H25 N2 O2 P S2	300.111	7.52		1.806	0.0100501
	C15 H31 N3 O3	301.237	1.229		0.176	0.0100846
	C11 H19 N3	193.158	2.007		0.443	0.0101359
	C24 H40 N O7 P	485.253	8.272		0.297	0.0102358
	C19 H39 N O3 S	361.265	18.574		1.765	0.0102615
	C27 H38 N10 O	518.324	7.756		1.991	0.0106398
	C25 H42 N O6 P	483.274	8.531		0.281	0.0106633
	C12 H25 O4 P S	296.12	6.431		0.31	0.0108625
	C22 H39 N O4	381.288	23.548		2.841	0.0109355
	C11 H17 N O5	243.111	6.035		0.508	0.0109442
	C13 H19 N2 P S	266.1	1.772		0.629	0.0109802
	C23 H43 N7 O3 P2	527.292	6.467		2.034	0.0110856
	C17 H31 N O6	345.215	4.783		1.398	0.0111601
	C13 H23 N4 O4 P	330.147	7.685		3.078	0.0111619
	C7 H14 N2 O2	158.106	1.325		0.417	0.0113492
	C24 H49 O4 P	432.335	19.451		3.524	0.0115062
	C9 H15 N3 O3	213.112	3.883		0.38	0.0115089
	C27 H49 N2 O4 P	496.341	21.78		0.334	0.0115282
	C22 H43 N O2	353.329	27.811		2.357	0.011575
	C17 H26 N4 O5 S	398.161	5.601		7.168	0.0116839
	C11 H17 N3 O5	271.117	2.982		0.263	0.011713
	C14 H24 O5	272.163	7.641		0.572	0.0117288
	C16 H25 O4 P	312.148	6.385		0.544	0.0117549
	C27 H43 N O5 S	493.286	8.886		1.477	0.0117559
	C14 H32 N6 O3 S2	396.197	15.162		6.536	0.0117632
	C34 H42 N4 O7 S	650.277	15.05		0.101	0.011776
	C30 H49 N2 O5 P	548.336	20.031		0.113	0.0118172
	C23 H34 N O9 P	499.196	9.317		1.882	0.011821
	C24 H43 N2 O5 P	470.29	5.006		0.605	0.0118273
	C17 H35 N O2	285.267	17.614		2.553	0.0118901
	C31 H56 N3 O2 P S	565.381	23.134		0.594	0.011918
	C11 H26 N7 O4 P	351.18	5.253		0.458	0.0120054
	C14 H7 N5	245.069	1.213		0.455	0.0120606
	C8 H14 N9 O3 P	315.096	1.374		0.705	0.0121458
	C16 H31 N8 O2 P S	430.203	7.132		0.518	0.0121559
	C20 H31 N3 O4	377.232	6.674		0.501	0.0123746
	C11 H18 N5 O4 P S2	379.052	1.225		2.543	0.0123962
	C15 H24 N3 O P S	325.138	15.045		0.198	0.0124191
	C15 H42 N9 O P S2	459.27	5.597		0.524	0.0125268
	C14 H32 N6 O S	332.235	10.83		0.4	0.012556
	C28 H45 N5	451.366	24.767		0.747	0.0128801
	C7 H10 N5 O3 P	243.051	1.209		0.506	0.0129597
	C22 H41 N4 O2 P	424.298	24.15		0.459	0.0129898
	C9 H6 O11 S	321.963	1.717		6.18	0.0130813
	C11 H24 N O5 P	281.138	4.574		0.527	0.0130972
	C19 H32 N4 O4 S	412.213	6.403		4.872	0.0131438
	C11 H19 N O5	245.127	1.781		0.291	0.0134048
	C18 H35 N4 O3 P	386.246	23.428		0.374	0.0135529
	C10 H19 N3 O3	229.143	3.862		0.483	0.0135582
	C8 H15 N8 O P	270.111	24.149		0.646	0.0135842
	C7 H9 N2 O2 P	184.04	1.321		0.426	0.0135843
	C20 H36 O14	500.213	5.536		0.438	0.0136449
	C6 H7 N3	121.063	1.248		0.545	0.0136974
	C6 H8 N2 O5 S	220.015	5.243		2.11	0.01371
	C14 H24 N2 O2	252.184	6.068		0.308	0.0139504
	C29 H46 N P3	501.284	7.73		0.249	0.0140154
	C21 H37 N O6 S	431.234	8.815		0.638	0.0140413
	C13 H29 N2 O6 P	340.175	4.982		0.392	0.0141519
	C28 H42 P2 S	472.249	9.33		4.387	0.014163
	C30 H44 N4 O	476.351	23.602		0.548	0.014265
	C52 H38 O	678.291	7.069		2.199	0.0143615
	C7 H14 N9 P	255.111	5.169		0.4	0.014473
	C8 H23 N8 O3 P	310.164	5.48		0.497	0.014548
	C35 H56 N4 O3	580.434	24.222		0.471	0.0146234
	C23 H30 N4 O2 S	426.208	11.11		1.219	0.0146304
	C37 H60 N9 O7 P	773.437	13.324		0.142	0.0146534
	C30 H44 N4 O3	508.34	24.499		0.768	0.0147372
	C13 H22 N2 O2	238.168	5.466		0.239	0.014763
	C15 H29 N3 O4	315.216	6.136		0.712	0.0147769
	C22 H34 N2 O P2 S	436.186	19.89		2.168	0.0147951
	C29 H53 N2 O7 P3	634.305	15.054		0.058	0.0148899
	C23 H37 N5 O	399.299	23.548		2.863	0.01492
	C9 H26 Cl N7 O4	331.174	5.76		0.648	0.0149444
	C17 H32 N6 O S	368.235	12.414		0.613	0.0149814
	C13 H20 N2 O5	284.137	4.03		0.457	0.015273
	C14 H39 N8 O P S2	430.243	5.66		0.537	0.0153099
	C14 H27 N3 O5	317.195	4.918		0.524	0.0153787
	C20 H33 N2 O5 P	412.213	6.227		3.714	0.0153987
	C16 H31 N6 O4 P	402.216	8.53		0.245	0.0155136
	C30 H46 N9 O6 P S	691.303	15.055		0.099	0.0156474
	C18 H42 N8 O4 S	466.307	24.495		0.714	0.0157123
	C8 H23 N6 O4 P	298.153	3.842		0.428	0.0157136
	C6 H17 N6 O3 P	252.111	1.348		0.662	0.0157369
	C49 H69 N2 O13 P	924.453	7.401		0.275	0.0157467
	C8 H22 N4 O2 P2	268.121	6.093		0.475	0.0158175
	C29 H56 O11 S	612.352	15.047		0.318	0.015932
	C22 H38 N2 O4	394.283	8.445		0.525	0.0159986
	C20 H45 N4 O3 P S2	484.265	5.404		0.442	0.0160155
	C21 H52 N9 O13 P	669.346	4.619		0.532	0.0160213
	C20 H35 N2 P S	366.227	5.431		0.619	0.0161438
	C21 H50 N9 O10 P	619.343	15.059		0.065	0.0162655
	C16 H26 N2 O2 S2	342.143	4.877		0.371	0.0163239
	C43 H64 O3 P2 S	722.404	8.317		3.538	0.016426
	C33 H47 N6 O5 P	638.332	9.463		0.043	0.0164455
	C14 H34 N5 O2 P	335.246	7.728		0.609	0.0165444
	C31 H43 N6 O2 P	562.316	12.75		0.432	0.0167402
	C14 H13 N8 O3 P	372.085	6.686		0.603	0.0167593
	C16 H41 N7 O3 S	411.299	9.136		0.153	0.0168482
	C11 H11 N5 O3	261.085	3.972		0.612	0.0169145
	C17 H26 N2 O4	322.189	8.696		0.173	0.0169246
	C44 H68 N O P	657.503	25.804		1.842	0.0170615
	C18 H15 N5 O	317.126	6.306		2.051	0.0170957
	C17 H30 N4 O8	418.207	4.38		0.478	0.0171331
	C19 H16 N4 O2	332.126	6.476		2.027	0.0171393
	C21 H45 N4 O5 P	464.314	24.133		0.773	0.0171945
	C19 H38 O S2	346.236	7.636		0.56	0.0172413
	C19 H33 O4 P S	388.185	1.315		0.462	0.0173951
	C17 H39 N7 P2	403.276	24.088		1.485	0.0174161
	C23 H50 N5 O4 P S2	555.302	4.776		0.537	0.0174853
	C25 H38 O2	370.287	24.597		0.389	0.0175574
	C24 H51 N10 O4 P	574.386	24.208		0.4	0.0175939
	C17 H47 N9 P2	439.345	22.263		0.54	0.0176199
	C21 H43 N10 O2 P	498.333	24.491		0.625	0.0178497
	C24 H56 N9 O6 P3	659.354	15.041		0.08	0.0179267
	C12 H25 N6 O4 P	348.168	8.967		2.247	0.0179891
	C14 H17 N5 O6	351.117	1.817		0.519	0.0180532
	C18 H21 N5 O3	355.164	12.053		2.227	0.0182904
	C12 H23 N6 O5 P	362.148	5.162		0.456	0.0183166
	C24 H33 N6 O2 P	468.24	7.574		0.408	0.0183214
	C29 H58 O12 P2	660.338	15.051		0.145	0.018351
	C19 H37 N8 P3	470.234	11.219		3.442	0.0183833
	C13 H18 N8 O	302.159	4.669		0.733	0.018499
	C11 H16 N P S	225.075	1.271		0.576	0.0185542
	C13 H31 N6 O3 P	350.221	7.828		0.253	0.0185863
	C22 H38 S3	398.213	12.419		4.362	0.0186113
	C27 H62 N9 P S	575.459	27.883		0.585	0.0186391
	C22 H25 N7 O2	419.205	6.307		2.133	0.018664
	C18 H34 N10 O S	438.262	7.852		0.613	0.0186922
	C21 H36 N7 O4 P	481.258	8.853		0.42	0.0187065
	C39 H54 O9 P2	728.324	8.239		2.207	0.0187472
	C14 H42 N10 O P2	428.301	6.281		0.306	0.0188339
	C31 H42 N4 O3	518.325	10.37		5.249	0.0188577
	C35 H53 N2 O3 P3	642.327	15.043		0.131	0.0190759
	C23 H47 N4 O4 P	474.335	22.175		0.501	0.0191469
	C19 H32 N4 O3 S	396.218	7.699		4.135	0.019214
	C8 H17 N10 O4 P	348.118	1.341		0.608	0.0193039
	C34 H40 N4 O8	632.285	8.271		4.491	0.0193103
	C6 H21 N7 P2 S	285.106	1.216		2.441	0.0193669
	C27 H51 N O4	453.382	20.96		0.359	0.0194228
	C16 H25 P S2	312.115	5.219		0.81	0.0194408
	C14 H16 N4 O4	304.116	26.539		0.656	0.0194806
	C16 H17 N O5	303.111	7.699		2.681	0.0195024
	C22 H47 N4 O P	414.35	21.846		0.442	0.0195438
	C19 H24 N4 O4	372.179	27.892		0.638	0.0195742
	C10 H27 N9 O S	321.206	6.698		0.418	0.0196056
	C18 H32 O7	360.215	24.128		2.105	0.0196341
	C10 H7 N5 O2 S	261.031	1.38		2.311	0.0196611
	C15 H23 N O6	313.152	7.456		0.391	0.0196795
	C56 H75 N2 O2 P	838.557	13.295		1.494	0.0197029
	C25 H40 N4 O	412.32	24.145		0.63	0.019858
	C31 H46 P2 S	512.281	12.68		1.633	0.0198697
	C16 H31 N P2	299.192	10.87		1.67	0.0199967
	C25 H34 N4 O	406.273	12.225		0.531	0.0201128
	C3 H N2 O5 P	175.963	1.122		0.637	0.020125
	C5 H N3 O2	135.007	3.913		0.382	0.0201432
	C31 H25 N S	443.169	8.442		0.37	0.020375
	C14 H16 N4 O	256.131	6.731		0.644	0.0204051
	C21 H46 N5 O P3	477.291	8.468		2.746	0.0204294
	C11 H10 N4 O4 S2	326.015	5.152		0.47	0.0204375
	C18 H45 N6 P	376.345	22.715		3.525	0.0205074
	C7 H16 N3 O4 P	237.087	4.037		0.603	0.020551
	C33 H53 N2 O2 P3	602.332	6.747		0.336	0.020556
	C8 H17 N7 O3	259.14	7.546		1.837	0.0205642
	C9 H12 N2 O4	212.08	1.784		0.601	0.0205852
	C6 H11 Cl N10 O	274.082	1.317		0.617	0.0206036
	C10 H14 O5	214.084	3.483		0.547	0.0206943
	C6 H19 Cl N6 O3	258.122	1.784		0.769	0.0207533
	C16 H20 N2 O4	304.142	8.254		2.01	0.0207624
	C15 H26 O5	286.178	6.699		0.594	0.0208009
	C27 H38 N4 O3	466.293	8.882		0.433	0.0209437
	C9 H19 N8 O2 P	302.137	26.547		0.708	0.0210942
	C37 H43 N4 O3 P	622.304	24.755		0.743	0.021161
	C21 H35 N O3 S	381.234	25.374		1.683	0.0212111
	C2 H8 N O7 P	189.003	1.182		1.455	0.0212674
	C18 H33 N O5	343.236	6.7		1.265	0.0212703
	C32 H52 N5 O4 P	601.375	11.584		1.783	0.0214164
	C15 H30 N O7 P	367.174	5.225		0.498	0.0214992
	C H N5 O4 S	178.974	1.184		2.009	0.0215432
	C8 H13 N O2 S	187.067	2.214		3.242	0.0215773
	C24 H36 O	340.277	24.199		0.682	0.02159
	C29 H51 N2 O2 P	490.366	18.547		0.557	0.0216031
	C9 H22 N9 O4 P	351.153	1.769		0.656	0.0216595
	C21 H39 N2 O6 P	446.253	5.75		2.542	0.0216652
	C17 H28 N2 O6	356.195	5.744		0.336	0.0217112
	C19 H28 N O2 P S2	397.131	5.718		1.632	0.0219034
	C34 H34 N P S	519.215	7.132		1.941	0.0219856
	C4 H12 N9 O2 P	249.086	1.319		0.734	0.0220068
	C11 H18 O6	246.11	26.573		0.753	0.0220337
	C24 H49 N4 O5 P S	536.318	14.954		0.619	0.0221105
	C21 H38 N5 O2 P	423.275	20.779		0.29	0.0222579
	C22 H38 N7 O6 P	527.263	8.736		0.291	0.0223069
	C14 H26 N4 O5	330.19	4.696		0.396	0.0223175
	C20 H31 N O4	349.225	6.826		0.442	0.0223179
	C9 H22 N3 O2 P	235.145	5.014		0.857	0.0224302
	C14 H20 N4 O2 S	308.13	6.573		0.568	0.0225239
	C11 H28 N9 O4 P	381.202	5.912		0.591	0.0225775
	C25 H49 N4 O P3	514.312	5.336		0.266	0.0227956
	C30 H25 O7 P3	590.081	3.907		0.225	0.0229306
	C23 H32 N4 O2	396.252	10.715		0.581	0.0229536
	C21 H43 N2 O6 P	450.285	6.285		0.315	0.0230693
	C17 H20 N2 O6	348.132	5.547		0.653	0.0231756
	C15 H33 N4 P	300.245	18.787		2.307	0.0232004
	C20 H43 N4 O3 P	418.309	26.005		0.633	0.0232313
	C18 H49 N10 O P S	484.354	24.982		0.602	0.0232351
	C16 H31 N O2 S	301.208	12.998		1.907	0.0233762
	C20 H33 O8 P	432.19	8.249		0.335	0.023406
	C32 H46 N4 O5	566.347	10.784		0.211	0.0234677
	C22 H41 O2 P	368.286	24.013		0.592	0.0236021
	C9 H15 N3 O3	213.112	3.656		0.295	0.0236387
	C22 H16 O2	312.115	4.796		0.427	0.0237918
	C13 H33 N8 O7 P	444.221	4.538		0.346	0.0239258
	C9 H22 P2	192.119	4.386		0.445	0.0239451
	C8 H22 N6 O2 S	266.152	6.363		0.368	0.0239706
	C13 H24 O5 S	292.135	6.693		3.895	0.0241023
	C21 H39 N S3	401.224	8.514		0.647	0.0241487
	C39 H55 N4 O P	626.414	6.354		1.545	0.0242046
	C28 H36 N2 O8	528.248	9.468		0.198	0.0242124
	C10 H33 N10 O10 P	484.214	4.055		0.684	0.024251
	C8 H25 Cl N6 O2 P2 S	366.093	1.291		0.419	0.0242921
	C26 H41 N2 P3 S	506.219	5.939		0.511	0.0245158
	C11 H10 N4 O4 S	294.042	3.793		0.58	0.0245231
	C21 H16 N5 O3 P	417.099	6.322		2.208	0.024556
	C30 H51 N O4	489.382	24.213		0.755	0.024602
	C23 H43 N4 O2 P	438.313	26.702		0.707	0.0246706
	C21 H30	282.235	27.114		1.871	0.0246884
	C30 H40 O5	480.286	23.64		0.542	0.0247513
	C15 H28 N4 O6	360.201	4.767		0.588	0.0247856
	C13 H13 N5 O	255.111	5.464		0.418	0.0248201
	C22 H41 N O4	383.303	23.507		1.416	0.0249385
	C26 H48 N2 O6	484.352	4.674		1.234	0.0249727
	C9 H24 N6 O5 S	328.152	24.154		0.773	0.0253379
	C18 H33 N3 O3	339.252	5.688		1.902	0.0255045
	C18 H22 N2 O5	346.153	7.741		0.583	0.0255995
	C9 H2 O4	173.995	1.864		2.013	0.0256215
	C15 H23 N3 O5	325.164	5.543		1.35	0.0256301
	C13 H17 N5 O3	291.132	1.319		0.707	0.0256585
	C12 H23 N S2	245.126	4.37		0.528	0.0256781
	C14 H27 N3 O5	317.195	4.692		0.547	0.0257235
	C7 H16 N9 P	257.127	4.464		0.417	0.0257447
	C13 H23 N O5 S	305.13	6.918		2.683	0.0258221
	C29 H32 N6 O4	528.248	8.298		0.155	0.0258878
	C17 H20 N2 O7	364.128	5.638		2.479	0.0259076
	C19 H37 N4 O4 P	416.257	14.005		1.736	0.0261417
	C5 H9 N8 O P	228.064	24.15		0.661	0.0262537
	C47 H82 N O9 P S	867.546	5.167		1.437	0.0262737
	C24 H34	322.266	24.198		0.689	0.0263159
	C23 H49 N8 O4 P S	564.332	9.411		0.476	0.0263282
	C12 H21 N3 O2	239.163	4.164		1.37	0.0263416
	C29 H50 O5	478.366	21.913		0.637	0.0263852
	C17 H37 N5 O4 P2	437.232	9.41		0.52	0.0264934
	C42 H26 N4 S2	650.16	9.801		4.856	0.0265748
	C20 H35 N O S3	401.187	24.536		1.497	0.0266256
	C14 H32 N7 O4 P	393.227	6.011		0.577	0.026654
	C24 H52 N6 O4 P2	550.352	20.038		0.196	0.0267255
	C8 H16 N9 O2 P	301.116	1.323		0.734	0.0267522
	C26 H42 N10 O2 P2	588.295	8.487		2.329	0.0267702
	C22 H29 N6 O P3	486.159	4.128		0.561	0.026783
	C17 H41 N10 O4 P S	512.275	6.199		2.359	0.0267987
	C25 H49 N O8	491.346	17.408		0.404	0.0268159
	C20 H16 N4 O2	344.126	7.684		1.867	0.0268262
	C23 H49 N4 O3 P	460.355	24.66		0.673	0.0269147
	C31 H53 N2 O7 P	596.358	15.056		0.067	0.0270475
	C18 H35 N4 O3 P	386.246	8.543		0.726	0.0271539
	C22 H38 O4 S4	494.164	6.76		1.577	0.0271701
	C35 H53 N2 O5 P S	644.343	9.478		0.168	0.0273008
	C18 H36 N2 O2 S	344.251	6.211		0.749	0.0275911
	C19 H28 N O3 P S	381.154	4.432		0.44	0.0277504
	C9 H14 N4 O3 S2	290.052	1.197		2.543	0.0278218
	C27 H43 N5 O P2	515.292	8.497		0.608	0.0278693
	C17 H32 N4 O5	372.238	5.99		0.669	0.0279035
	C15 H16 N4 O4	316.116	26.556		0.796	0.0282162
	C30 H54 P2 S2	540.313	10.449		0.457	0.0282325
	C33 H67 N4 O4 P3	676.437	25.904		0.679	0.0283331
	C14 H23 Br N2	298.106	26.533		0.663	0.0283912
	C18 H39 N5 O7 P2	499.232	7.833		1.634	0.0284566
	C11 H30 N6 O S	294.22	22.565		0.482	0.0285813
	C20 H44 N O2 P	361.309	23.189		1.26	0.0286471
	C7 H10 N2 O P2 S	231.999	1.23		3.085	0.0286561
	C9 H12 N9 O3 P	325.08	9.791		4.856	0.0286607
	C18 H35 N5 O5 P2	463.211	10.006		0.641	0.0286763
	C25 H30 N O2 P S	439.175	5.473		0.569	0.0287093
	C16 H18 N2 O4	302.127	7.578		2.06	0.0288214
	C15 H32 N8 O8 P2	514.182	4.969		0.687	0.028822
	C19 H31 N4 O2 P	378.217	6.301		0.685	0.028865
	C37 H48 O10 S	684.298	8.242		5.521	0.0289853
	C16 H24 N5 O4 P S	413.129	9.05		2.085	0.0291111
	C6 H2 O8 S	233.946	1.708		2.506	0.0291262
	C26 H31 N3 O6	481.221	8.386		2.276	0.0291886
	C28 H50 N5 O P3	565.323	5.453		0.394	0.0292193
	C23 H49 N4 O P	428.366	24.297		0.507	0.0292633
	C34 H49 N2 O11 P	692.307	7.49		4.704	0.0292707
	C20 H20 N4 O2	348.158	6.806		2.962	0.029325
	C24 H48 Cl2 N6	490.33	24.157		0.53	0.0294451
	C22 H35 P S	362.221	8.515		0.197	0.0294685
	C12 H33 N8 O4 P	384.237	5.714		0.523	0.0295538
	C19 H45 N4 O3 P S	440.293	23.824		0.531	0.0295904
	C19 H31 N3 O3 S	381.209	6.855		0.279	0.0296052
	C20 H38 O8	406.258	5.56		0.773	0.0296376
	C19 H28 N2 O5	364.2	8.854		0.561	0.0298379
	C23 H43 N7 O2 P2	511.297	8.784		1.691	0.0299035
	C25 H38 Cl O4 P	468.218	9.313		1.34	0.0300371
	C13 H15 N8 O3 P S	394.073	7.566		3.426	0.0300607
	C17 H37 N2 O9 P	444.223	4.194		0.377	0.0301357
	C32 H44 N4 O5	564.332	13.783		0.177	0.0301938
	C19 H35 N8 P	406.272	12.907		0.655	0.030237
	C15 H20 N4 O	272.163	6.204		0.632	0.0302406
	C27 H48 O6 P2	530.292	11.966		1.714	0.0302431
	C14 H15 N5 O2	285.122	5.125		0.503	0.0303014
	C24 H51 N2 O3 P S4	574.253	7.689		0.335	0.0303274
	C10 H15 N O5	229.095	4.793		0.481	0.0304508
	C13 H23 N O S2	273.122	4.548		0.516	0.0305606
	C20 H27 N P2	343.163	1.32		0.691	0.0305875
	C31 H48 N4 O8 S	636.316	9.455		0.466	0.0306946
	C7 H22 N9 O5 P	343.148	1.329		0.796	0.0308259
	C25 H30 N8 O3 S	522.215	7.148		1.703	0.0308498
	C23 H47 N4 O4 P	474.335	17.356		0.566	0.03088
	C32 H57 N S3	551.365	22.19		0.435	0.0309023
	C10 H11 N3 O3	221.08	4.553		4.719	0.0309099
	C17 H18 N4 O4	342.132	25.637		0.62	0.0309807
	C13 H24 N2 O3	256.178	4.502		0.139	0.0310077
	C20 H32 N3 O7 P S	489.17	1.24		2.281	0.0310284
	C15 H29 N3 O4	315.216	5.965		0.534	0.0310618
	C15 H15 N5 O	281.129	26.44		5.991	0.0310945
	C17 H22 Cl N3	303.151	6.66		1.691	0.0311986
	C6 H17 N8 O P S	280.098	7.111		0.479	0.0312076
	C14 H37 N5 O5 P2	417.227	8.568		0.302	0.0312588
	C23 H47 N4 O P	426.35	19.675		0.515	0.0313494
	C34 H53 N8 O7 P3 S	810.297	8.27		2.871	0.0313527
	C35 H46 N4 O6	618.34	15.045		0.071	0.0314589
	C13 H15 N O4	249.1	4.998		0.52	0.0315166
	C20 H40 N3 O4 P S2	481.221	6.683		2.574	0.0315681
	C12 H35 N10 O3 P S2	462.207	13.297		1.631	0.0316217
	C6 H N O6 S2	246.924	1.707		2.513	0.0316242
	C19 H16 N6 O S	376.109	7.82		1.849	0.0317207
	C22 H45 N4 O3 P	444.324	24.505		0.579	0.0317569
	C18 H39 N4 O6 P S	470.234	9.487		1.316	0.0317667
	C8 H8 N3 P	177.045	5.065		1.532	0.0318431
	C22 H50 N6 O2 P2	492.346	17.354		0.587	0.0318691
	C12 H30 N7 O4 P	367.211	4.312		0.644	0.0319263
	C11 H17 N O5	243.111	5.043		0.275	0.0320215
	C2 H7 N6 P	146.047	2.299		0.689	0.0320752
	C26 H48 Cl N2 O4 P	518.303	18.517		1.764	0.0320801
	C46 H69 N4 O2 P3	802.463	9.231		0.115	0.0320987
	C20 H42 N6 O8 S	526.28	6.879		0.602	0.0321189
	C10 H10	130.078	6.196		0.592	0.0322073
	C16 H38 N10 O S2	450.269	7.28		0.162	0.0323577
	C22 H33 N9 O S2	503.226	7.617		0.472	0.0323728
	C28 H38 N4 O4	494.29	5.488		0.887	0.0324256
	C19 H39 N6 O6 P	478.268	13.096		2.904	0.032639
	C18 H26 N3 O3 P	363.171	5.418		0.471	0.0329521
	C13 H19 N3 O5	297.133	3.538		0.68	0.0329555
	C25 H32 N4 O	404.257	11.917		0.63	0.0329835
	C12 H25 N6 O3 P	332.174	5.671		0.683	0.0330043
	C20 H43 N4 O2 P	402.314	23.984		0.505	0.0330586
	C28 H36 N2 O8	528.248	9.619		0.161	0.0330883
	C24 H36 N4 O3 S	460.25	7.913		3.991	0.033196
	C9 H26 N7 O3 P	311.185	5.612		0.634	0.033373
	C9 H25 Cl N10 O7 S	452.131	1.306		0.579	0.0333942
	C13 H14 N4 O4	290.1	26.518		0.517	0.0334281
	C42 H48 N6	636.396	8.443		0.838	0.0336052
	C10 H31 N8 O4 P	358.222	4.636		0.515	0.0336265
	C6 H22 N7 O4 P	287.148	3.909		0.631	0.0337612
	C18 H21 N P2	313.116	4.32		0.604	0.0338427
	C23 H47 N4 O P	426.35	17.89		0.576	0.0338956
	C13 H36 Br N7 O13 P2	639.102	8.474		0.84	0.0339029
	C26 H37 N3 O5	471.274	10.311		0.092	0.0339734
	C28 H56 O7 P2	566.348	7.86		0.439	0.0340793
	C12 H29 N4 P S	292.184	5.058		1.322	0.0341878
	C16 H18 N2 O4	302.127	7.134		1.722	0.0342021
	C6 H9 Cl N2 O2 P2 S	269.955	1.223		2.999	0.0342976
	C19 H32 N7 O3 P	437.232	12.56		0.476	0.0344041
	C7 H10 O7 S	238.015	1.328		0.588	0.0344087
	C10 H9 N3 O4	235.059	4.483		3.754	0.0347116
	C12 H17 N O4	239.116	2.19		0.639	0.0347398
	C37 H71 N O5 P2	671.482	25.9		0.475	0.0347408
	C17 H26 N2 O4	322.189	7.274		0.322	0.0348574
	C27 H39 O4 P S	490.231	8.522		0.285	0.0349285
	C12 H23 N3 O2	241.179	3.712		0.629	0.0349626
	C14 H30 O4 S2	326.159	1.313		0.571	0.0350938
	C9 H18 O4	190.12	5.244		0.418	0.0351076
	C18 H30 N O7 P	403.175	6.135		0.46	0.0352082
	C32 H40 N2 O4 S	548.271	3.551		0.371	0.0352753
	C12 H23 N O6	277.153	1.316		0.581	0.0353631
	C32 H56 O P2 S	550.352	18.954		0.133	0.0353696
	C25 H43 N4 O P	446.318	27.062		2.243	0.0353767
	C23 H45 N4 O2 P	440.329	25.193		0.592	0.0354289
	C23 H41 N3 O3	407.315	18.721		1.426	0.0355481
	C21 H43 N4 P	382.324	15.92		0.599	0.0355981
	C24 H20 N4 O7 S	508.105	5.053		1.418	0.0356051
	C10 H14 N6 S	250.099	3.11		0.505	0.0356069
	C16 H35 N4 O2 P	346.251	24.185		0.831	0.0356308
	C26 H36 N4 O3 S	484.25	26.368		0.269	0.035693
	C16 H19 N5 O4	345.143	4.53		0.521	0.0357995
	C24 H38 N O8 P	499.232	8.739		1.419	0.0358493
	C21 H48 N8 O3 P2 S	554.303	11.716		1.665	0.0359546
	C33 H51 N6 O7 P	674.353	7.798		0.174	0.036004
	C8 H N2 O3 P	203.972	3.182		0.53	0.0360096
	C11 H30 N8 O14 P2 S	592.107	7.749		0.805	0.0360126
	C18 H39 N4 O P	358.287	21.816		0.597	0.03624
	C7 H13 N8 O3 P	288.085	2.366		0.599	0.0363048
	C20 H32 N4 O4	392.243	3.939		0.614	0.0363188
	C15 H34 N7 O4 P	407.242	6.406		0.781	0.0364669
	C28 H40 N4 O	448.319	20.651		0.64	0.0365147
	C6 H18 N7 O3 P	267.122	1.324		0.65	0.036874
	C14 H24 N4 O4	312.18	5.203		0.342	0.0369644
	C15 H28 N2 O4	300.205	4.948		0.675	0.0370364
	C19 H28 N7 O5 P	465.19	9.107		1.783	0.037089
	C28 H33 N7 O2	499.269	7.187		0.667	0.0371731
	C8 H24 N9 O3 P	325.175	1.317		0.761	0.0371993
	C23 H47 N4 O2 P	442.345	25.614		0.579	0.0372258
	C13 H17 Cl2 N O2	289.065	1.274		0.475	0.0372323
	C20 H37 O10 P	468.211	6.692		0.343	0.0373075
	C31 H46 N4 O	490.366	21.169		0.359	0.0373593
	C11 H8 N2 O7 S	312.005	3.729		1.81	0.0373991
	C51 H44 N10 O11	972.319	4.171		0.606	0.0374847
	C28 H50 O7	498.356	18.367		0.713	0.0374948
	C14 H28 N6 O2 S	344.199	8.593		2.331	0.0375214
	C8 H12 O8	236.053	1.31		1.441	0.0376351
	C15 H15 N5 O3	313.117	5.364		0.799	0.0376427
	C3 H6 N6 O S	174.033	1.095		0.669	0.037963
	C14 H26 N2 S2	286.153	5.817		0.67	0.0381529
	C13 H27 N6 O2 P	330.194	6.344		0.586	0.0381902
	C25 H29 N3 O3	419.221	12.556		0.426	0.0383197
	C12 H17 N O4	239.116	5.194		0.663	0.0383716
	C12 H22 N5 O4 P	331.143	4.593		0.406	0.0383801
	C4 H16 N6 O10	308.092	1.243		2.053	0.0386808
	C15 H23 N3 O6	341.159	4.506		0.476	0.0387959
	C13 H23 N4 O3 P	314.152	8.74		4.163	0.0388667
	C20 H36 O S3	388.193	7.141		0.425	0.0389036
	C17 H37 N2 O3 P S2	412.2	6.764		3.685	0.0389274
	C33 H36 N8 S	576.276	24.493		0.675	0.038948
	C4 H11 N3 O P2	179.038	1.098		0.705	0.0389725
	C20 H36 S3	372.197	10.29		0.635	0.0390578
	C24 H40 N O6 P	469.258	10.171		0.17	0.0391855
	C20 H26 N4	322.215	18.954		0.34	0.0392254
	C7 H26 N10 O3 S	330.19	3.772		0.595	0.0393983
	C11 H8 N3 O4 P	277.025	2.313		1.54	0.0394486
	C24 H32 N2 O6	444.226	8.261		0.454	0.0394916
	C19 H29 N3 O6	395.206	5.218		0.687	0.0395507
	C11 H26 N7 O3 P	335.185	5.234		0.897	0.0397668
	C34 H72 N9 O P3	715.509	25.872		0.596	0.0397876
	C16 H31 O7 P	366.179	6.468		0.545	0.0399013
	C16 H23 N5 O S	333.161	6.511		0.748	0.0399154
	C32 H32 O S	464.216	8.633		0.159	0.040081
	C13 H16 N4	228.138	7.597		0.619	0.0402198
	C28 H42 N4 O2 S	498.302	14.823		1.819	0.0403854
	C10 H18 O6	234.11	4.56		0.818	0.0404383
	C19 H36 O6	360.252	13.111		0.762	0.0404507
	C17 H32 N4 O5	372.238	5.842		0.595	0.0404839
	C18 H27 N4 O5 P	410.173	10.066		0.35	0.0405668
	C7 H21 N6 O3 P	268.142	1.789		0.506	0.040758
	C23 H49 N4 O4 P	476.351	26.604		0.483	0.0407972
	C13 H14 N4 O4	290.101	1.402		0.533	0.0408034
	C14 H27 N6 O5 P	390.179	6.237		0.457	0.0408162
	C36 H56 N O5 P3	675.336	9.141		0.216	0.0408854
	C35 H36 N8 O4	632.285	7.279		3.113	0.0409596
	C21 H29 N5	351.241	7.634		0.626	0.0411739
	C17 H39 N5 O5	393.296	18.586		0.462	0.0412477
	C5 H19 N8 O3 P	270.133	1.317		0.766	0.0412542
	C17 H31 N3 O6	373.222	5.002		0.44	0.04143
	C14 H14 N4 O6	334.091	4.531		0.444	0.0414406
	C8 H11 N6 O3 P	270.062	1.203		0.518	0.0414581
	C36 H68 N8 O8 P2	802.463	7.372		0.104	0.041536
	C19 H41 N4 O3 P	404.293	23.306		0.636	0.0415409
	C5 H18 N10 O2 S	282.133	4.537		0.646	0.0415433
	C16 H37 N5 O7 P2	473.217	6.659		1.951	0.0418548
	C23 H50 N8 O10	598.365	15.072		0.072	0.041902
	C6 H4 Cl O6 P3	299.89	1.037		1.243	0.0419269
	C15 H35 N2 O8 P	402.212	4.607		0.572	0.042031
	C11 H7 N4 O2 P S	290.003	2.738		1.421	0.0420943
	C19 H24 N4 O4	372.179	25.633		0.74	0.0422253
	C18 H32 O9	392.206	5.217		0.532	0.0425386
	C26 H58 N5 O2 P S	535.406	22.423		0.474	0.0425634
	C26 H58 N4 O4 P2 S	584.367	5.062		1.311	0.0425832
	C11 H22 N7 O6 P	379.138	3.816		2.212	0.0426483
	C7 H15 N	113.121	3.46		0.663	0.0427198
	C9 H14 N2 O2	182.106	3.853		0.309	0.0427683
	C19 H36 N O6 P	405.226	7.195		0.213	0.0428779
	C15 H27 N O5	301.189	4.625		1.172	0.0429248
	C10 H15 N3 O6	273.096	1.344		1.611	0.0429824
	C29 H50 S4	526.279	6.647		2.906	0.0430057
	C19 H14 N4 O	314.116	8.032		1.841	0.0430255
	C69 H81 N5 O4 S	1075.6	10.191		0.235	0.0430788
	C31 H47 N S2	497.313	24.486		0.594	0.0431103
	C31 H46 N4 O	490.367	16.349		0.267	0.0432825
	C24 H51 N O10 P2	575.296	6.628		0.66	0.0432868
	C15 H30 N10 S2	414.208	7.643		1.426	0.0434045
	C13 H15 N4 O3 P	306.089	4.889		2.829	0.0434659
	C9 H22 N2 O12	350.119	1.292		0.358	0.0434938
	C17 H37 N9 O9	511.272	6.983		0.436	0.0435786
	C26 H26 N P	383.179	1.765		0.668	0.0436551
	C20 H44 N6 O2 S	432.324	23.922		0.693	0.0436962
	C28 H55 P3 S	516.323	9.99		1.463	0.0436997
	C19 H48 N8 O4 S	484.352	25.265		0.649	0.0438047
	C15 H35 N9 O11	517.243	7.349		0.352	0.0438351
	C29 H47 N5 O S	513.352	10.936		0.515	0.0438501
	C22 H38 N2 O3	378.288	8.769		0.629	0.0439582
	C3 H N7 O2 P2	228.968	1.706		2.088	0.0440412
	C33 H39 N6 O5 P	630.269	9.19		2.089	0.0440591
	C9 H14 O2 P2 S	248.018	5.041		0.087	0.0441018
	C15 H24 N10 O2 S	408.182	8.678		0.719	0.0443714
	C29 H44 N2 O P2 S	530.267	26.16		1.451	0.0444551
	C27 H52 N4 P2 S	526.341	26.552		1.43	0.0445144
	C44 H56 N2 O3	660.428	21.836		2.266	0.0445442
	C9 H20 O5 S	240.103	6.024		0.256	0.0445761
	C22 H39 N8 P	446.304	12.018		0.784	0.0446033
	C19 H14 N4 O3	346.105	7.678		1.861	0.0448173
	C22 H37 N3 P2 S2	469.19	27.887		0.6	0.0449107
	C32 H46 N4 O4	550.352	8.332		0.167	0.0450338
	C26 H64 N9 P S2	597.446	26.867		0.732	0.0451014
	C13 H12 N4 O3	272.09	1.459		0.526	0.0451058
	C7 H17 O10 P	292.056	1.282		0.585	0.04528
	C7 H11 N8 O2 P	270.074	3.41		0.436	0.045411
	C6 H11 N2 P	142.066	5.786		0.607	0.0454921
	C20 H36 N2 O P2 S	414.204	21.868		1.124	0.0454943
	C7 H12 N2 O2	156.09	1.302		0.689	0.0455346
	C18 H24 Cl N3 S	349.138	3.58		0.556	0.045646
	C37 H32 N4 O6	628.231	8.245		19.591	0.0456683
	C8 H11 N3 O5	229.07	1.79		1.577	0.0457323
	C10 H11 N3 O3	221.08	4.72		5.44	0.0458328
	C11 H20 O2 S	216.119	5.694		1.868	0.0459369
	C23 H45 N4 O P	424.334	24.323		0.346	0.0459424
	C21 H45 N4 O3 P	432.324	24.264		0.571	0.0459526
	C11 H24 O P2 S	266.102	4.306		0.235	0.045955
	C21 H49 N4 O5 P	468.345	11.122		0.554	0.0459551
	C18 H22 N2 O6	362.148	6.323		0.87	0.0460249
	C4 H10 N9 P	215.079	1.225		0.602	0.0460321
	C18 H28 N2 O6	368.195	4.943		0.482	0.0460547
	C5 H6 N10	206.079	1.355		0.605	0.0461205
	C21 H36 N4 O	360.288	18.775		0.645	0.0461477
	C8 H14 N2	138.116	5.053		4.241	0.0464279
	C12 H19 N4 O5 P	330.11	4.967		1.656	0.0464827
	C12 H14 N9 O2 P	347.101	5.618		1.511	0.0465296
	C5 H16 N9 P	233.126	1.328		0.768	0.046595
	C12 H20 O9	308.111	1.848		0.772	0.0467891
	C18 H35 N4 O4 P	402.239	9.232		0.113	0.0468396
	C15 H6 N6 O3 S	350.021	5.05		1.789	0.0468409
	C18 H28 N2 O6	368.195	7.292		0.307	0.0468789
	C13 H25 N3 O4	287.185	4.018		0.725	0.0469951
	C53 H110 N6 O17 P2	1164.74	5.464		1.292	0.0470055
	C20 H38 N4 O5	414.285	5.784		0.591	0.0470442
	C20 H41 N O2 S	359.286	22.075		1.838	0.0470913
	C20 H47 N4 O4 P S	470.304	21.626		1.328	0.0471014
	C10 H22 Cl N O S2	271.083	1.204		0.15	0.0472323
	C10 H24 N2 O6 P2	330.11	5.636		1.634	0.0472972
	C28 H52 O6 P2	546.321	18.795		0.434	0.0473176
	C20 H44 N2 O3 P2	422.282	25.574		0.644	0.0476392
	C14 H14 N4 O2	270.111	26.551		0.798	0.0476454
	C19 H20 N4 O7	416.132	4.565		0.631	0.0477123
	C16 H33 N7 O2 P2 S	449.187	6.884		1.596	0.0478546
	C51 H82 N3 P S	799.596	25.908		1.548	0.0481134
	C22 H42 N2 O6 S	462.276	7.967		0.52	0.048156
	C15 H42 N10 O P2 S2	504.247	6.855		0.326	0.0481753
	C20 H34 N3 O6 P	443.219	12.548		0.5	0.0482847
	C19 H26 N4 O2	342.205	9.319		0.579	0.0483159
	C12 H28 N8 O2 S	348.205	6.061		0.675	0.0483594
	C24 H38 O	342.292	21.468		0.211	0.0484292
	C32 H44 N4 O4	548.336	8.195		0.525	0.0484387
	C14 H31 N8 P	342.241	13.122		0.655	0.0489896
	C8 H26 N6 O4 P2	332.149	5.439		0.81	0.0490745
	C26 H45 N6 O5 P	552.318	5.596		0.374	0.0491137
	C19 H32 N7 O5 P	469.222	8.85		0.782	0.0492099
	C32 H39 N2 O5 P	562.258	26.444		4.269	0.0493217
	C49 H76 N4 O5	800.581	13.312		1.267	0.0494057
	C26 H47 N2 O7 P	530.311	5.131		0.38	0.0494216
	C29 H44 N10 O5	612.353	9.046		0.633	0.0494519
	C13 H15 N O11 S	393.037	1.882		1.696	0.0494919
	C10 H23 N8 O P	302.173	5.852		0.698	0.0495051
	C13 H14 N4 O4	290.101	4.24		0.576	0.0495386
	C32 H23 N3	449.187	9.831		1.36	0.0495402
	C48 H97 N10 O6 P3	1002.68	23.919		0.44	0.049702
	C34 H44 N4 O8	636.316	7.008		0.581	0.049725
	C25 H35 N3 O9	521.238	6.771		0.184	0.049953
	C4 H9 N O3 S2	183.002	1.81		3.001	0.049976

## Sheet: S7
Differentialy abundant pathways in mice
pathway	Control (7 days)	GDM( 21 days)	FC (7 days)	Control (21 days)	GDM( 21 days)	FC (21 days)	lmm.p	lmm.fdr	description
PWY-922	8.53871e-07	1.57381e-05	18.4315	6.32776e-06	4.81208e-05	7.60471	6.14624e-05	0.0175168	mevalonate pathway I
PWY-5910	1.21963e-06	2.24252e-05	18.3869	9.02878e-06	6.84564e-05	7.58202	5.93281e-05	0.0170272	superpathway of geranylgeranyldiphosphate biosynthesis I (via mevalonate)
PWY-5971	0.000319012	0.00146524	4.59305	0.000899541	0.00305597	3.39725	2.55904e-05	0.00742123	palmitate biosynthesis II (bacteria and plants)
HEME-BIOSYNTHESIS-II	0.000123266	0.000296065	2.40183	0.000251332	0.000304354	1.21096	3.85528e-05	0.0111418	heme biosynthesis I (aerobic)
PWY0-1415	0.000178852	0.000396442	2.21659	0.000340713	0.000424962	1.24727	6.06953e-05	0.0173589	superpathway of heme biosynthesis from uroporphyrinogen-III
PWY-5918	0.000283766	0.000620222	2.18568	0.000525953	0.00061955	1.17796	0.000143816	0.0406999	superpathay of heme biosynthesis from glutamate
PWY-6122	0.00770032	0.0071566	0.929389	0.008133	0.00783835	0.963771	1.78584e-05	0.00521467	5-aminoimidazole ribonucleotide biosynthesis II
PWY-6277	0.00770032	0.0071566	0.929389	0.008133	0.00783835	0.963771	1.78584e-05	0.00521467	superpathway of 5-aminoimidazole ribonucleotide biosynthesis
PEPTIDOGLYCANSYN-PWY	0.00629667	0.00584539	0.92833	0.00665776	0.00639842	0.961047	5.00759e-06	0.00147724	peptidoglycan biosynthesis I (meso-diaminopimelate containing)
PWY-6121	0.00809344	0.00750958	0.927861	0.00852574	0.00821371	0.963402	6.10573e-06	0.00179508	5-aminoimidazole ribonucleotide biosynthesis I
GLYCOCAT-PWY	0.0080796	0.00747334	0.924964	0.0076936	0.00745058	0.968413	4.0653e-06	0.00120333	glycogen degradation I (bacterial)
PWY-6387	0.0062979	0.00582471	0.924865	0.00664552	0.00636371	0.957594	8.65941e-06	0.00253721	UDP-N-acetylmuramoyl-pentapeptide biosynthesis I (meso-diaminopimelate containing)
PWY-6385	0.00616741	0.00569318	0.923106	0.00651183	0.006258	0.96102	4.27122e-05	0.0123011	peptidoglycan biosynthesis III (mycobacteria)
PWY-6386	0.00616412	0.00565289	0.917063	0.00649393	0.0061906	0.95329	0.000100892	0.0286533	UDP-N-acetylmuramoyl-pentapeptide biosynthesis II (lysine-containing)
PWY-7323	0.00665016	0.00591726	0.889792	0.00727864	0.00688795	0.946323	0.000147591	0.0416206	superpathway of GDP-mannose-derived O-antigen building blocks biosynthesis
DTDPRHAMSYN-PWY	0.0100726	0.008665	0.860252	0.0108213	0.0093997	0.868632	0.000248621	0.0698626	dTDP-L-rhamnose biosynthesis I

## Sheet: S8
Dietry features used for prediction
Feature	Fold_Change (GDM/Control)	pvalue	FDR
protein	1.11214	0.373467	0.699996
total_fat	1.13625	0.450911	0.720119
carbohydrates	0.953322	0.382126	0.699996
food_energy	1.04178	0.990418	0.998935
alcohol	2.12593	0.0189333	0.364466
moisture	0.960292	0.869635	0.975153
total_dietary_fiber	0.883723	0.225166	0.699996
calcium	0.861365	0.114448	0.699996
iron	1.03298	0.969133	0.998935
magnesium	0.948417	0.308633	0.699996
phosphorus	1.06337	0.524467	0.755308
potassium	0.924682	0.245154	0.699996
sodium	1.00834	0.497028	0.735983
zinc	1.24702	0.116297	0.699996
copper	0.956387	0.871736	0.975153
vitamin_a_iu	0.929303	0.726643	0.902444
vitamin_a_re	0.94663	0.598152	0.794098
carotene	1.04819	0.844495	0.975153
vitamin_e	0.930272	0.294893	0.699996
vitamin_c	0.688803	0.0502932	0.699996
thiamin	0.905476	0.307367	0.699996
riboflavin	0.967925	0.47531	0.720119
niacin	1.11587	0.550878	0.757457
vitamin_b6	1.07846	0.417976	0.708576
folate	0.880593	0.408832	0.708576
vitamin_b12	1.25937	0.15882	0.699996
cholesterol	1.17691	0.276235	0.699996
saturated_fat	1.29236	0.218104	0.699996
butyric	1.00082	0.798822	0.975153
caproic	1.02292	0.823635	0.975153
caprylic	0.958053	0.944683	0.998935
capric	1.03544	0.95212	0.998935
lauric	1.16842	0.292439	0.699996
myristic	1.19292	0.717648	0.902444
palmitic	1.15192	0.588919	0.794098
stearic	1.32932	0.341413	0.699996
oleic	1.06699	0.988289	0.998935
linoleic	1.03951	0.247328	0.699996
linolenic	0.950192	0.540235	0.756329
arachidonic	1.22361	0.23803	0.699996
docosahexanoic	0.713096	0.948853	0.998935
palmitoleic	1.12285	0.888577	0.977435
parinaric	0.00781213	0.0938442	0.699996
gadoleic	0.848181	0.468734	0.720119
eicosapentaenoic	0.298348	0.159868	0.699996
erucic	0.124727	0.0596342	0.699996
docosapentaenoic	0.480514	0.693737	0.902444
mono_unsaturated_fat	1.10343	0.857047	0.975153
poly_unsaturated_fat	1.00321	0.463835	0.720119
vitamin_d	0.813452	0.998935	0.998935
total_sugars	1.07931	0.873838	0.975153
trans_fatty_acids	1.58375	0.156676	0.699996
isoleucine	1.08762	0.285161	0.699996
leucine	1.09069	0.275648	0.699996
valine	1.08696	0.258401	0.699996
lysine	1.09693	0.346857	0.699996
threonine	1.09366	0.296124	0.699996
methionine	1.10955	0.249516	0.699996
phenylalanine	1.06694	0.346857	0.699996
tryptophan	0.0156657	0.529696	0.755308
histidine	1.10137	0.370608	0.699996
tyrosine	1.08822	0.266355	0.699996
arginine	1.08825	0.390907	0.699996
cystine	1.07642	0.338711	0.699996
serine	1.06775	0.294893	0.699996
eer	inf	0.722325	0.902444
sugar_alcohols	5.08046	0.0106301	0.272839
maklid		0.00269176	0.103633
tachila		0.00269176	0.103633
fructose	0.798625	0.389435	0.699996
iodine	0	0.252809	0.699996
vitamin_k	0.748978	0.255044	0.699996
selenium	1.05891	0.476962	0.720119
choline	1.13915	0.274474	0.699996
biotin	0.620479	0.423305	0.708576
manganese	0.914897	0.346857	0.699996
pantothenic_acid	1.05937	0.317595	0.699996

## Sheet: S9
Nutritional charchtersitics for helathy and control women
nutrient	Healthy controls	GDM
N	224	31
food_energy Kcal	1635.958±459.29	1708.89±858.67
protein gr	70.42±24.63	78.84±38.83
% protein	17.48±5.27	18.46±5.5
carbohydrates gr	197.01±68.01	188.39±78.07
%carb	48.25±9.9	44.89±6.9
total_fat gr	62.02±25.34	70.67±50.23
%fat	33.78±8.49	36.35±7.27
total_dietary_fiber_gr	21.64±9.36	19.11±9.16
saturated_fat	19.08±9.91	24.78±26.38
mono_unsaturated_fat	23.2±9.81	25.64±18.98
poly_unsaturated_fat	15.03±10.73	15.13±7.28
total_sugars	65.05±37.84	70.54±61.32
vegan/vegeterian	19	0
Daily sweet bevarages consumption	24	3
